1 **Metabolic, Fibrotic, and Splicing Pathways Are All Altered in Emery-Dreifuss Muscular**  
2 **Dystrophy Spectrum Patients to Differing Degrees**

3

4 Jose I. de las Heras<sup>1</sup>, Vanessa Todorow<sup>2</sup>, Lejla Krečinić-Balić<sup>2</sup>, Stefan Hintze<sup>2</sup>, Rafal  
5 Czapiewski<sup>1</sup>, Shaun Webb<sup>3</sup>, Benedikt Schoser<sup>2</sup>, Peter Meinke<sup>2,\*</sup>, Eric C. Schirmer<sup>1,\*</sup>

6

7 <sup>1</sup>Institute of Cell Biology, University of Edinburgh, Edinburgh, UK

8 <sup>2</sup>Friedrich-Baur-Institute, Department of Neurology, LMU Clinic, Ludwig-Maximilians-  
9 University, Munich, Germany

10 <sup>3</sup>Wellcome Centre for Cell Biology, University of Edinburgh, Edinburgh, UK

11

12

13

14

15

16

17 \*Co-corresponding authors:

18 Eric C. Schirmer

19 Institute of Cell Biology; University of Edinburgh, Kings Buildings; Michael Swann Building,

20 Room 5.22; Max Born Crescent; Edinburgh, EH9 3BF, UK; Phone: +441316507075; E-Mail:

21 [e.schirmer@ed.ac.uk](mailto:e.schirmer@ed.ac.uk)

22

23 Peter Meinke

24 Friedrich-Baur-Institute, Department of Neurology, LMU Clinics, Ludwig-Maximilians-

25 University, Ziemssenstrasse 1, 80336 Munich, Germany; Phone +4989218078279; E-Mail:

26 [Peter.Meinke@med.uni-muenchen.de](mailto:Peter.Meinke@med.uni-muenchen.de)

27

28 **Abstract**

29 Emery-Dreifuss muscular dystrophy (EDMD) is a genetically and clinically variable disorder.  
30 Previous attempts to use gene expression changes find its pathomechanism were  
31 unavailing, so we here engaged a functional pathway analysis. RNA-Seq was performed on  
32 cells from 10 patients diagnosed with an EDMD spectrum disease with different mutations in  
33 7 genes. Upon comparing to controls, the pathway analysis revealed that multiple genes  
34 involved in fibrosis, metabolism, myogenic signaling, and splicing were affected in all  
35 patients. Splice variant analysis revealed alterations of muscle-specific variants for several  
36 important muscle genes. Deeper analysis of metabolic pathways revealed a reduction in  
37 glycolytic and oxidative metabolism and reduced numbers of mitochondria across a larger  
38 set of 14 EDMD patients and 7 controls. Intriguingly, the gene expression signatures  
39 segregated the patients into three subgroups whose distinctions could potentially relate to  
40 differences in clinical presentation. Finally, differential expression analysis of miRNAs  
41 changing in the patients similarly highlighted fibrosis, metabolism, and myogenic signaling  
42 pathways. This pathway approach revealed a clear EDMD signature that can both be used  
43 as the basis for establishing a biomarker panel specific to EDMD and direct further  
44 investigation into its pathomechanism. Furthermore, the segregation of specific gene  
45 changes into three distinct categories that appear to correlate with clinical presentation may  
46 be developed into prognostic biomarkers, though this will first require their testing in a wider  
47 set of patients with more clinical information.

48

49 **Keywords**

50 Emery-Dreifuss, muscular dystrophy, EDMD, skeletal muscle

51

## 52 **Introduction**

53 Emery-Dreifuss muscular dystrophy (EDMD) is a genetically heterogeneous neuromuscular  
54 orphan spectrum disease affecting ~0.3-0.4 in 100,000 people <sup>1</sup>, with clinical variability  
55 presenting even in family members carrying the same mutation <sup>2-5</sup>. EDMD patients present  
56 typically in mid to late childhood with early contractures of elbows and Achilles' tendons and  
57 progressive wasting of the lower leg and upper arm muscles. Cardiac involvement is also  
58 highly characteristic but tends to appear later in development and quite variably in time,  
59 though it tends to be reasonably uniform in the form it takes of cardiac conduction defects  
60 and dilated cardiomyopathy <sup>6</sup>. Other features vary considerably in clinical presentation,  
61 leading to the usage of 'Emery-Dreifuss-like syndromes' <sup>7; 8</sup>: patients from the same pedigree  
62 can show remarkable phenotypic variation <sup>2</sup>. The genetic variability is underscored by  
63 several confirmed linked genes and several additional candidate genes, although there are  
64 still some cases where no confirmed or candidate disease allele has been identified <sup>9-11</sup>. The  
65 lack of large pedigrees in combination with its genetic heterogeneity, clinical variability,  
66 already some known modifier genes, and limited patient numbers makes solving its  
67 pathomechanism difficult.

68         The original genes linked to EDMD, *EMD* encoding emerin and *LMNA* encoding  
69 lamin A, have both cytoskeletal and gene regulation roles leading to strong arguments for  
70 either function being responsible for the EDMD pathomechanism <sup>12; 13</sup>. The subsequent  
71 linking of nesprin and Sun proteins to EDMD <sup>14; 15</sup> failed to lend clarity since they function in  
72 mechanosignal transduction <sup>16</sup>. However, several recently linked genes have clear roles in  
73 genome organization and regulation <sup>10</sup>, suggesting this is the pathomechanism. These  
74 genes encode proteins that, like emerin, are nuclear envelope transmembrane proteins  
75 (NETs) and seem to function by fine-tuning muscle gene expression by promoting the  
76 release of pro-myogenic genes from the nuclear periphery to enhance their activation while  
77 concomitantly recruiting metabolism genes (many from the alternative differentiation  
78 pathway of adipogenesis) to the nuclear envelope to better repress them <sup>17-19</sup>. EDMD  
79 mutations were found in 5 muscle-specific NETs with this genome organization function,

80 PLPP7 (also known as NET39), WFS1, TMEM38A, TMEM201, and Tmem214, and each  
81 tested had some specificity in the sets of genes that they target, though there was also some  
82 overlap<sup>17</sup>. These studies together with the wide range of lamin gene regulatory activities led  
83 us to the distinct and non-traditional hypothesis for the EDMD pathomechanism where  
84 moderate reductions in many genes could have the same phenotype as a shutdown of a  
85 single gene on a particular pathway. Accordingly, we considered that searching for  
86 uniformity with a pathway analysis might be more revealing than searching for uniformity in  
87 the regulation of particular genes.

88 The only previous study, to our knowledge, using gene expression changes to  
89 identify critical misregulated genes underlying EDMD pathophysiology, focused on the  
90 identification of genes altered specifically in EDMD compared to a set of 10 other muscular  
91 dystrophies<sup>20</sup>. This study only considered 8 total *LMNA*- or *EMD*-linked cases of EDMD, but  
92 EDMD now has many more genes and modifiers linked to it and, moreover, there is a wider  
93 clinical spectrum of EDMD-like phenotypes<sup>11</sup>. Their analysis indicated potential  
94 abnormalities in the regulation of cell cycle and myogenic differentiation, associated with  
95 perturbations in the pRB/MYOD/LMNA hub, which were consistent with changes in an *Emd*<sup>-/-</sup>  
96 mouse model<sup>21</sup>. Roughly a fifth each of EDMD mutations occurs in *LMNA* and *EMD* while  
97 another 5-6% are collectively caused by four other widely expressed nuclear envelope  
98 proteins nesprin 1 (encoded by *SYNE1*), nesprin 2 (encoded by *SYNE2*), Sun1 (encoded by  
99 *SUN1*) and FHL1 (encoded by *FHL1*)<sup>14; 15; 22-24</sup>). Another approximately 20% of EDMD  
100 mutations were accounted for by muscle-specific NETs that regulate muscle-specific  
101 genome organization<sup>10</sup>. These include NET39 (encoded by *PLPP7*), TMEM38A (encoded  
102 by *TMEM38A*), WFS1 (encoded by *WFS1*), NET5 (encoded by *TMEM201*), and TMEM214  
103 (encoded by *TMEM214*) that affect 3D gene positioning with corresponding effects on  
104 expression<sup>17; 19</sup>. Accordingly, we sought to search for commonly affected pathways from a  
105 much wider range of EDMD-linked genes including *LMNA*, *EMD*, *FHL1*, *SUN1*, *SYNE1*,  
106 *PLPP7*, and *TMEM214* alleles on the expectation that the most important pathways for  
107 EDMD pathophysiology would be highlighted.



109 **Material and methods**

110 **Patient materials**

111 The sources of patient samples were the Muscle Tissue Culture Collection (MTCC) at the  
112 Friedrich-Baur-Institute (Department of Neurology, Ludwig-Maximilians-University, Munich,  
113 Germany) and the MRC Centre for Neuromuscular Disorders Biobank (CNDB) in London.

114

115 **Ethical approval and consent to participate**

116 All materials were obtained with written informed consent of the donor at the CNDB or the  
117 MTCC. Ethical approval of the Rare Diseases biological samples biobank for research to  
118 facilitate pharmacological, gene and cell therapy trials in neuromuscular disorders is covered  
119 by REC reference 06/Q0406/33 with MTA reference CNMDBBL63 CT-2925/CT-1402, and  
120 for this particular study was obtained from the West of Scotland Research Ethics Service  
121 (WoSRES) with REC reference 15/WS/0069 and IRAS project ID 177946. The study  
122 conduct and design complied with the criteria set by the Declaration of Helsinki.

123

124 **Myoblast culture and in vitro differentiation into myotubes**

125 Myoblasts were grown in culture at 37 °C and 5% CO<sub>2</sub> using a ready to use formulation for  
126 skeletal muscle (PELOBiotech #PB-MH-272-0090) and maintained in subconfluent  
127 conditions. In order to induce differentiation, the cells were grown to confluency and 24 h  
128 later the growth medium replaced with skeletal muscle differentiation medium (Cell  
129 Applications #151D-250). The differentiation medium was replaced every other day.  
130 Myotubes were selectively harvested after 6 days by partial trypsinization followed by gentle  
131 centrifugation (Figure S1). Each differentiation experiment was performed in triplicate on  
132 different days.

133

134 **RNA extraction**

135 Total RNA was extracted from each sample and separated into a high molecular weight  
136 fraction (> 200 nt, for mRNA-Seq) and a low molecular weight fraction (< 200 nt, for miRNA-

137 Seq) with the Qiagen RNeasy (#74134) and miRNeasy (#1038703) kits, according to the  
138 manufacturer's instructions. RNA quality was assessed with a Bioanalyzer, and all samples  
139 had a RIN > 7, with an average of 9.4 (Table S1).

140

#### 141 **mRNA-Seq analysis**

142 Between 3-5ug of total RNA were sent to Admera Health LLC. (NJ, USA) for sequencing in  
143 paired-end mode, 2x 150 nucleotides, using an Illumina HiSeq 2500 sequencer. The  
144 sequencing library was prepared with the NEBNext Ultra II kit, with RiboZero rRNA depletion  
145 (NEB #E7103). Between 60-90 million paired end reads were obtained from each sample  
146 and mapped to the human genome (Hg38) with STAR v2.7.5a<sup>96</sup> using default parameters.  
147 Mapping quality was assessed with FastQC v0.11.9  
148 (<https://www.bioinformatics.babraham.ac.uk/projects/fastqc>). Sequencing adaptors were  
149 removed with trimmomatic v0.35<sup>97</sup>. Low quality reads and mitochondrial contaminants were  
150 removed, leaving on average 70 million useful reads per sample (Table S1). Differential  
151 expression analysis was performed in R with DESeq2 v1.32.0<sup>98</sup> after transcript quantitation  
152 with Salmon v1.4.0<sup>99</sup>. We used an FDR threshold of 5% for differential expression.

153

#### 154 **miRNA-Seq analysis**

155 miRNA was sent to RealSeq Biosciences Inc. (SC, USA) for sequencing using an Illumina  
156 NextSeq 500 v2 sequencer in single end mode, 1x 75 nucleotides. The sequencing library  
157 was prepared with Somagenics' Low-bias RealSeq-AC miRNA library kit (#500-00012) and  
158 quality assessed by TapeStation (Lab901/Agilent). On average 5 million good quality reads  
159 were obtained per sample. Mapping and quality trimming was performed using the NextFlow  
160 nf-core/smrnaseq pipeline (web resources) with default parameters, which summarizes the  
161 reads per miRNA using the annotations from mirTop (web resources). Differential  
162 expression analysis was performed in R with DESeq2 v1.32.0. We used an FDR threshold  
163 of 0.2 for differential expression. Putative miRNA targets were extracted from miRDB (web  
164 resources) for each differentially expressed miRNA and their expression compared against

165 the miRNA. We kept as potential targets those genes whose expression changed in the  
166 opposite direction of the miRNA.

167

### 168 **Bakay muscular dystrophy dataset analysis**

169 Normalized (MAS5.0) microarray transcriptome data for a panel of 11 muscular dystrophies  
170 and healthy controls were downloaded from the Gene Expression Omnibus database  
171 (GEO), accession GSE3307 (web resources). Differential expression analysis comparing  
172 each disease to the controls was performed using Limma 3.48.1<sup>100</sup>. We used an FDR  
173 threshold of 5% for differential expression.

174

### 175 **Functional analyses**

176 Functional analyses were performed with g:Profiler<sup>101</sup> and Gene Set Enrichment Analysis  
177 (GSEA v4.1.0)<sup>35</sup> tools. g:Profiler was used to determine enriched categories within a set of  
178 DE genes, with an FDR of 5% as threshold. GSEA was performed with default parameters,  
179 in particular using 'Signal2Noise' as ranking metric and 'meandiv' normalization mode.  
180 Redundancy in category lists was reduced by comparing the similarity between each pair of  
181 enriched categories using Jaccard similarity coefficients. Hierarchical clustering (k-means)  
182 was then applied to the resulting matrix in order to identify groups of similar functional  
183 categories, and a representative from each group chosen. Full unfiltered results are shown  
184 in Supplemental Table S3. Tissue-specific gene enrichment analysis was evaluated with  
185 TissueEnrich<sup>102</sup>.

186 For the miRNA-Seq experiments, functional analysis was first performed using  
187 g:profiler on the set of DE miRNA genes. Then, putative targets for each miRNA were  
188 extracted and their expression compared to the relevant miRNA. Putative targets whose  
189 expression was not altered in the opposite direction as the miRNA were removed from the  
190 list. Significant functions were displayed using Cytoscape v3.8.2<sup>103</sup>, with the size of the  
191 functional labels proportional to the number of miRNAs assigned to each function.

192



193 **Real time metabolic measurements**

194 Metabolic measurements on primary human myoblast cultures were performed using a  
195 Seahorse XFp Extracellular Flux Analyzer (*Agilent Technologies*). For this, myoblasts of  
196 matched passage number were seeded in XFp Cell Culture Miniplates (103025-100, *Agilent*  
197 *Technologies*) at a density of  $1.5 \times 10^4$  cells per well. Cell density was assessed using an  
198 automated cell counter (TC20, BioRad). Oxygen consumption rates (OCR) respectively  
199 extracellular acidification rates (ECAR) were measured using the Mito Stress Test Kit and  
200 the Glycolysis Stress Test Kit (*Agilent Technologies*) according to the manufacturer's  
201 instructions. Samples were measured in triplicates and each measurement was repeated  
202 between two and four times. Data were normalized to the number of cells and analyzed for  
203 each well.

204

205 **Fuel dependency tests**

206 Glucose dependency and fatty acid dependency were determined according the instruction  
207 of Agilent Seahorse XF Mito Fuel Flex Test kit (Agilent). The glutamine dependency was  
208 determined from the glucose and fatty acid measurements.

209

210 **Mitochondrial gene quantification**

211 Reverse transcription of RNA was performed using the QuantiTect Reverse Transcription  
212 Kit (Qiagen) following the manufacturer's instructions. For the reaction we used the SYBR®  
213 Green Master Mix (Bio-Rad) and samples were run and measured on CFX Connect™ (Bio-  
214 Rad). As genome reference gene *B2M* (FP: 5'-TGCTGTCTCCATGTTTGATGTATCT-3'; RP:  
215 5'-TCTCTGCTCCCCACCTCTAAGT-3')<sup>104</sup> Primer sequences for the mitochondrial genome  
216 were: FP: 5'-TTAACTCCACCATTAGCACC-3'; RP: 5'-GAGGATGGTGGTCAAGGGA-3'.<sup>105</sup>  
217 Samples were analyzed using the delta Ct method.

218

219 **Splice site prediction analysis**

220 Raw data was mapped to the human genome assembly GRCh38 (hg38) and sorted by  
221 coordinate using STAR 2.7.9a<sup>96</sup> for analysis in DESeq2<sup>98</sup> and DEXSeq<sup>106</sup>, trimmed using  
222 an in-built trimming function for rMATS<sup>107</sup> or counted using Kallisto 0.48.0<sup>108</sup> for  
223 isoformSwitchAnalyzer (ISA)<sup>109</sup>. All analyses were performed for G1, gp1, gp2, and gp3  
224 separately. Visualizations were conducted in R version 4.1.2.

225 DESeq2: Mapped reads were counted using FeatureCounts, then analysed using  
226 DESeq2<sup>98</sup>. The R package fgsea was used for gene set enrichment analysis, genes were  
227 assigned to biological pathways retrieved from MSigDB v7.5.1  
228 (c5.go.bp.v7.5.1.symbols.gmt, 7658 gene sets,<sup>35</sup>). Splicing pathways and their genes were  
229 plotted using GOPlot<sup>110</sup>.

230 DEXseq: Mapped reads were counted using the in-built DEXseq counting function in  
231 python 3.9. Standard DEXseq workflow was followed. Exons with logFCs > |1| and p-values  
232 < 0.05 were set to be significantly different.

233 rMATS: Standard workflow was followed, code was executed in python 2.7. Results  
234 were analysed in R and set to be significantly differentially spliced with psi-values > |0.1| and  
235 p-values < 0.05. Pie charts displaying the distribution of event usage were generated for all  
236 groups (Supps. something) GO term enrichment analyses was performed using g:profiler2  
237<sup>111</sup>. All events were searched for muscle specific genes using a set of 867 genes relevant for  
238 muscle system process, development, structure and contraction, combined from GO terms  
239 (GO:0003012, GO:0006936, GO:0055001 and GO:0061061).

240 ISA: Kallisto counts were read into R and standard ISA procedure was followed,  
241 including Splicing analysis using DEXseq, coding potential using CPC 2.0<sup>112</sup>, domain  
242 annotation using HmmerWeb Pfam 35.0<sup>113</sup>, signal peptides using SignalP 5.0<sup>114</sup> and  
243 prediction of intrinsically unstructured proteins using IUPred2A<sup>115</sup>. In-built visualization tools  
244 were used for splicing maps.

245

## 246 **Results**

### 247 *RNA-Seq Analysis of EDMD Patient Cells*

248 We performed RNA-Seq on myotubes differentiated *in vitro* from myoblasts isolated from 10  
249 unrelated EDMD patients with distinct mutations in 7 different genes to sample the genetic  
250 diversity of EDMD (**Figure 1**). Patient mutations were TMEM214 p.R179H, PLPP7/NET39  
251 p.M92K, Sun1 p.G68D/G388S, Nesprin 1 p.S6869\*, Emerin p.S58Sfs\*1, FHL1 mutations  
252 c.688+1G>A, p.C224W, and p.V280M, and Lamin A mutations p.T528K and p.R571S.  
253 These mutations covered a wide range of clinical phenotypes with the age of onset ranging  
254 from early childhood to adult life and associated pathology ranging from no reported  
255 contractures to rigid spine (**Table 1**). Myoblast isolation followed by *in vitro* differentiation  
256 was chosen over directly isolating mRNA from the tissue samples in order to try to capture  
257 the earliest changes in gene expression due to the disease mutations and to reduce tertiary  
258 effects and variation from the age of the patients, range in time from onset to when biopsies  
259 were taken, and differences in biopsy site (**Table 1**). These patient variables could also  
260 affect the efficiency of myotube differentiation; so, to ensure that different percentages of  
261 undifferentiated cells in the population did not impact measuring gene expression changes,  
262 the myotubes were specifically isolated by short trypsinization thus removing all myoblast  
263 contamination (**Figures 1 and S1**). To define the baseline for comparison, 2 age-matched  
264 healthy controls were similarly analyzed. Samples from all patients and controls all yielded  
265 high-quality reads ranging between 28 and 47 million paired-end reads (**Table S1**).

266 First, we compared each individual patient against the controls. Compared to the  
267 controls, each individual patient had between 310 and 2,651 upregulated genes and  
268 between 429 and 2,384 downregulated genes with an FDR of 5% (**Figure 1**). The large  
269 difference in the number of differentially expressed genes between patients suggested large  
270 heterogeneity. When we calculated the intersection of DE genes in all patients, only three  
271 genes were similarly downregulated (*MTCO1P12*, *HLA-H*, *HLA-C*), and one upregulated  
272 (*MYH14*) at 5% FDR, indicating a high degree of variation between patients (**Figure S2**).  
273 *MTCO1P12* is a mitochondrially-encoded pseudogene that has been reported to be severely  
274 downregulated in inflammatory bowel disease, associated with reduced mitochondrial  
275 energy production <sup>25</sup>. *HLA-C* is a member of the MHC class I and is involved in interferon

276 gamma signaling while HLA-H is a pseudogene derived from HLA-A which may function in  
277 autophagy<sup>26-28</sup>. Mutations in non-muscle myosin gene *MYH14* appear to be associated with  
278 hearing loss rather than muscle defects<sup>29; 30</sup>, although it has also been recently linked to  
279 mitochondrial fission defects<sup>31</sup>.

280 In order to identify common features despite the above-mentioned heterogeneity, we  
281 next compared the patients as a single group against the controls instead of one-by-one and  
282 we denoted this comparison as G1 (one single group) throughout the text (**Figure 1**). The  
283 G1 comparison revealed a signature of 1127 DE genes (894 upregulated and 233  
284 downregulated). Approximately 60% of these genes identified were altered in the same  
285 manner in all 10 patients, although only 4 of them had an associated FDR value below 0.05  
286 (**Figure S2**). The remaining 40% appear to be quite variable between patients in level of  
287 expression and/or direction of change. Such distinction in gene expression signatures might  
288 also contribute to clinical variation in EDMD.

289 Hierarchical clustering identified three broad patient subgroups based on gene  
290 expression patterns (**Figure 1**). These groupings were: Group 1 - Emerin p.S58Sfs\*1,  
291 Tmem214 p.R179H, NET39 p.M92K, Lamin A p.R571S, FHL1 p.C224W; Group 2 - Sun1  
292 p.G68D/G388S, Fhl1 c.688+1G>A, Fhl1 p.V280M; Group 3 - Nesprin 1 p.S6869\*, Lamin A  
293 p.T528K (**Fig. 1D**). The same groups were independently identified using a principal  
294 component analysis (PCA) (**Figure S2**). Of particular note, PCA and t-distributed stochastic  
295 neighbor embedding (t-SNE) analyses both revealed that clustering was independent of  
296 parameters such as patient gender or age or myotube enrichment differences (**Figure S3**).  
297 Moreover, the several FHL1 and lamin A mutations tested segregated into different  
298 expression subgroups. At the same time, the more recently identified EDMD mutations in  
299 TMEM214 and NET39 segregated with more classic emerin, FHL1, and lamin A mutations,  
300 further indicating the likelihood that their genome organizing functions could mediate core  
301 EDMD pathophysiology.

302 The hypothesis that EDMD is a disease of genome organization misregulation is  
303 underscored by the fact that 15% of the genes changing expression in EDMD patient cells

304 were altered by knockdown of at least 1 of the 4 muscle-specific genome-organizing NETs  
305 that we previously tested <sup>17</sup> (**Figure 1**). Interestingly, in that study most of the genes altered  
306 by knockdown of NET39, TMEM38A, and WFS1 were non-overlapping, while those altered  
307 by knockdown of TMEM214 exhibited considerable overlap with the sets altered by each of  
308 the other NETs <sup>17</sup>. However, here there were roughly 70 DE genes overlapping with the sets  
309 of genes altered by knockdown of each individual NET while the total number of DE genes  
310 under the regulation of any of the four NETs was 165, indicating an enrichment in the EDMD  
311 DE set for genes influenced by multiple NETs (**Figure 1**). Thus, it is not surprising that  
312 NET39 and TMEM214 were both segregated together. Another interesting observation is  
313 that the number of NET-regulated genes overlapping with Group 1 and Group 3 was similar,  
314 but much fewer were overlapping for Group 2. This suggests that gene misregulation in  
315 Groups 1 and 3 might be more strongly mediated by the muscle-specific NET-gene tethering  
316 complexes than in Group 2.

317

### 318 *Functional Pathway Analysis of Gene Expression Changes in EDMD Patient Cells*

319 The primary aims of this study were to determine whether a functional pathway analysis  
320 would be more effective at revealing the underlying EDMD pathomechanism than just  
321 looking for uniformly altered genes and to identify possible biomarkers in the gene  
322 expression signatures. Before using this approach with the wider set of EDMD alleles, we  
323 applied a pathway analysis to the data from the previous microarray study by Bakay and  
324 colleagues where just *LMNA* and *EMD* mutations were considered <sup>20</sup>. We reanalyzed  
325 Bakay's EDMD data and extracted the subset of DE genes with FDR of 5% (1349 and 1452  
326 up- and down-regulated genes, respectively). In order to identify enriched functional  
327 categories within each set of DE genes, we used g:Profiler <sup>32</sup>. This tool calculates the  
328 expected number of genes to be identified for any given functional category by chance and  
329 compares it to the number of genes observed. We selected categories that were significantly  
330 enriched with an FDR of 5%. The resulting list was then summarized by selecting  
331 representative classes using a similar approach to Revigo <sup>33</sup>, but extended to other

332 functional category databases in addition to gene ontology (GO) terms. Briefly, similarity  
333 matrices were generated by calculating pairwise Jaccard similarity indices between  
334 categories and used this information to group together similar functional categories based on  
335 the genes identified. Redundancy was then reduced by choosing a representative category  
336 from each group.

337       The functional categories enriched in the set of EDMD-upregulated genes revealed  
338 defects in cytokine signaling, organization of the extracellular matrix (ECM), and various  
339 signaling pathways important for muscle differentiation and function (e.g. PI3K-Akt, TGF-  
340 beta, SMADs). In addition, there was an aberrant upregulation of alternative differentiation  
341 pathways, notably adipogenesis but also angiogenesis and osteogenesis. The functions  
342 highlighted among the downregulated genes were largely related to metabolism,  
343 mitochondrial especially, as well as ribosome biogenesis, muscle contraction, and myofibril  
344 assembly (**Figure 2**). Applying the same methodology to our wider set of patient alleles  
345 highlighted fewer pathways than what we observed in the Bakay EDMD data. Among the  
346 upregulated categories, neurogenesis and ECM-related functions stood out, as well as  
347 MAPK signaling, lipid transport, and TAP binding which is linked to interferon-gamma  
348 signaling<sup>34</sup>. One category stands out among the downregulated genes: RNA splicing  
349 (**Figure 2**). The data above used g:Profiler which is very sensitive to the number of DE  
350 genes identified because it looks for statistical overrepresentation of genes belonging to  
351 specific functional categories among a set of previously identified DE genes. By contrast,  
352 gene set enrichment analysis (GSEA)<sup>35</sup> does not prefilter the data and instead ranks all  
353 genes according to the difference in expression between the two conditions tested: controls  
354 and EDMD. Next, it determines whether the distribution in the ranked list for any given  
355 functional category is random or significantly enriched statistically at either end of the ranked  
356 list. This method is especially sensitive for detecting functional categories where many  
357 genes are altered by a small amount and does not consider individual gene p-values.  
358 Therefore, we also applied GSEA to our data, querying several functional genesets within  
359 the Reactome, KEGG and WikiPathways databases, found in the Molecular Signatures

360 Database (MSigDB)<sup>36</sup>. This approach identified a larger set of functional categories that  
361 generally expanded on those identified by g:Profiler and matched better what we observed  
362 from the Bakay EDMD geneset, with strong links to ECM organization that may be relevant  
363 to fibrosis, cytokine signaling, metabolism, differentiation, and splicing (**Figure 2**).

364 An expansion of categories for metabolic functions included specific categories for  
365 diabetes mellitus, adipogenesis, white and brown fat differentiation, nitrogen metabolism  
366 fatty acid metabolism, retinol metabolism, and many others. Similarly, there was an  
367 expansion of cytokines supporting inflammation for the fibrotic pathways and proteoglycans  
368 and elastin adding to the previous emphasis on collagens for ECM defects. Among the  
369 differences between our data and Bakay's EDMD data, two categories stand out: RNA  
370 splicing and calcium signaling, which were only observed in our data. It is unclear how much  
371 this reflects using terminally differentiated muscle material versus early stages of  
372 differentiation *in vitro*, or a factor of microarray versus RNAseq analysis. In some cases, this  
373 is most likely due to the different transcriptome platform used. For example, applying GSEA  
374 to genomic positional genesets revealed near uniform upregulation of all mitochondrially  
375 encoded genes (**Figures 2 and 3**). This could not be observed on Bakay's data because the  
376 microarrays did not contain probes for mitochondrially encoded genes. The upregulation of  
377 mitochondrial transcripts could lead to increased oxidative stress<sup>37</sup>. This finding provides yet  
378 another mechanism that could lead to metabolic dysregulation on top of the alterations  
379 already indicated by the nuclear genome transcript changes. This further underscored the  
380 need to test for actual metabolic deficits in the patient cells themselves as well as to further  
381 investigate the other functional pathways highlighted by this analysis.

382

### 383 *Detailed Analysis of Metabolic Pathways Uniformly Altered in EDMD Patients*

384 Since metabolic disruption has been previously reported to affect muscle  
385 differentiation/myoblast fusion<sup>38</sup>, we decided to investigate this further. While we identified a  
386 general upregulation of mitochondrially-encoded genes, Bakay's data showed a  
387 downregulation of several classes related to mitochondrial function (**Figure 2**) which was

388 due entirely to nuclear-encoded genes, as there were no mitochondrial genes represented in  
389 the microarrays (**Figure 3**). When we checked the behavior of those genes in our data, we  
390 did not observe the same downregulation when considering all 10 patients as a single group  
391 (**Figure 3**). However, this is largely due to variability among the patient subgroups identified  
392 earlier, suggesting a mechanistic breakdown between them. Group 1 which contained half of  
393 our patients, including emerin and lamin A mutations, exhibited the same general  
394 downregulation of the nuclear-encoded mitochondrial genes. In contrast, Group 2 displayed  
395 no alteration in gene expression, while Group 3 showed upregulation although this was  
396 driven mostly by patient 9 (*LMNA*) with the other patient in the group, patient 4 (*SYNE1*),  
397 displaying very few changes. While no single gene was uniformly altered in the same  
398 direction for all patients, several genes from glycolytic and oxidative metabolism pathways,  
399 typically encoding components of mitochondrial complexes, were altered in all tested  
400 patients. Other non-mitochondrial metabolic pathways were also altered such as lipid  
401 translocation (**Figure 2 and Table S3**). Interestingly, downregulation of nuclear-encoded  
402 mitochondrial genes was also generally observed in other muscular dystrophies included in  
403 the study by Bakay and colleagues (**Figure S4**)

404 To investigate the relevance of these gene changes to cellular metabolism, we  
405 performed real-time metabolic analysis using the Seahorse XFp Extracellular Flux Analyzer.  
406 Myoblasts isolated from the above patients plus several additional EDMD patients and  
407 controls were tested, so that we had a total of 14 EDMD patients and 8 controls for this  
408 analysis (**Table 1**). Probing for glycolysis, a significant reduction of the extracellular  
409 acidification rate in the EDMD samples was observed (**Figure 3**). Next, we investigated  
410 mitochondrial function. When testing for basal respiration there was also a significant  
411 reduction of the oxygen consumption rate in the EDMD samples (**Figure 3**). There were no  
412 significant differences in fuel dependency, but ATP production was considerably reduced in  
413 the EDMD samples (**Figure 3**). The significant reduction in mitochondrial respiration raised  
414 another possibility to investigate, that the absolute number of mitochondria might also be  
415 down due to problems in mitochondria biogenesis. Therefore, we quantified relative



416 mitochondria numbers using by qPCR. This revealed a clear reduction in mitochondria  
417 numbers (**Figure 3**), which with the generally elevated mitochondrial genome transcripts  
418 would suggest that a reduction in mitochondria numbers resulted in an over-compensation of  
419 expression which in turn could have resulted in inhibiting mitochondrial fission and repair.  
420 Thus, we also investigated whether genes in pathways associated with mitophagy were  
421 altered in the patients. Indeed, multiple mitophagy pathway genes were altered in all patients  
422 (**Figure 3**). Although no one individual gene was altered in all the patients, it is worth noting  
423 *CISD2* is significantly downregulated in most patients. Reduction of *CISD2* has been linked  
424 to degeneration of skeletal muscles, misregulated  $Ca^{2+}$  homeostasis and abnormalities in  
425 mitochondrial morphology in mouse<sup>39</sup>, as well as cardiac dysfunction in humans<sup>40</sup>.

426

#### 427 *Detailed Analysis of Other Pathways Uniformly Altered in EDMD Patients*

428 Several studies suggest that the timing of several aspects of myotube fusion could underlie  
429 some of the aberrancies observed in patient muscle<sup>41</sup> and, though it is unclear whether  
430 fibrosis drives the pathology or is a consequence of the pathology, fibrosis has been  
431 generally observed in EDMD patient biopsies. Contributing to these processes could be  
432 several subpathways that fall variously under the larger pathways for ECM/ fibrosis, cell  
433 cycle regulation, and signaling/ differentiation (**Figure 4**). As for the metabolic analysis, no  
434 individual genes were altered in cells from all patients, but every patient had some genes  
435 altered that could affect ECM through changes in collagen deposition (**Figure 4**). For  
436 example, 35 out of 46 collagen genes exhibited changes in at least one comparison (Bakay  
437 EDMD, G1 or one of the subgroups gp1, gp2 and gp3) and all patients had multiple of these  
438 genes altered (**Figure S5**). Note that it often appears visually that the Bakay data in the first  
439 column has little change when viewing the cluster analysis, but when looking at the full set of  
440 genes listed in the matching supplemental figures there are definitely some genes strongly  
441 changing, just not necessarily the same ones. This may be due to differences in the  
442 myogenic state of the material studied: while Bakay and colleagues used muscle biopsies  
443 containing terminally differentiated muscle fibres, we focused on the earlier stages of

444 myogenesis by *in vitro* differentiating cultured myoblasts obtained from muscle biopsies.  
445 Despite this, it is important to note that while different genes may be affected, most of the  
446 same pathways were highlighted in both Bakay's and our study. Collagens COL6A1,  
447 COL6A2, COL6A3, COL12A1 are linked to Bethlem Muscular Dystrophy <sup>42-45</sup> and,  
448 interestingly, all these collagens were upregulated in Group 1 patient cells and  
449 downregulated in Group 3 patient cells (**Figure S5**). Matrix metalloproteinases were also  
450 altered with 13 out of 28 matrix metalloproteinases exhibiting changes in at least one of the  
451 comparisons and all patients had multiple of these genes altered (**Figures 4 and S5**).  
452 Notably the metalloproteinase MMP1 (collagenase I), which has been proposed to resolve  
453 fibrotic tissue <sup>46</sup>, was downregulated in all but one patient, as well as in Bakay EDMD  
454 samples. Likewise, multiple genes associated with fibrosis from FibroAtlas (**Figures 4 and**  
455 **S6**) and with inflammation that would support fibrosis such as cytokine (**Figures 4 and S7**)  
456 and INF-gamma signaling (**Figures 4 and S8**) were affected in all patients. In fact, out of  
457 941 genes in FibroAtlas there were 542 altered between all the patients. Heatmaps of gene  
458 clusters with similar expression patterns are shown in Figure 4, but more detailed individual  
459 panels with all gene names listed are shown in **Figures S5-S11**. A few genes that stand out  
460 for their functions within the INF-gamma signaling pathway include IRF4 that is a regulator of  
461 exercise capacity through the PTG/glycogen pathway <sup>47</sup> and ILB1 that helps maintain  
462 muscle glucose homeostasis <sup>48</sup> such that both could also feed into the metabolic pathways  
463 altered.

464 Another subpathway critical for myogenesis and the timing and integrity of myotube  
465 fusion is cell cycle regulation. Cell cycle defects could lead to spontaneous differentiation  
466 and were previously reported in myoblasts from EDMD patients and in tissue culture cell  
467 lines expressing emerin carrying EDMD mutations which could lead to depletion of the stem  
468 cell population <sup>41; 49</sup>. All tested EDMD patients exhibited downregulation of multiple genes  
469 involved in the degradation of cell cycle proteins (**Figures 2, 4, and S8**) which could indicate  
470 an uncoupling of the joint regulation of cell cycle and myogenesis program <sup>50</sup>, for example  
471 cells starting to fuse when they should still be dividing or *vice versa*.

472 Other pathways in addition to ECM deposition directly associated with myogenic  
473 differentiation, myoblast fusion, and muscle regeneration were also altered in all patients  
474 (**Figures 4 and S9-S10**), though, again, no single gene in these pathways was altered in the  
475 same way in all patients' cells. Poor differentiation and myotubes with nuclear clustering  
476 were observed in differentiated EDMD myoblast cultures <sup>14</sup> and in the mouse C2C12  
477 differentiation system when EDMD-linked NETs were knocked down <sup>17</sup>.

478 Previous work using C2C12 cells identified six genes whose products are required in  
479 the early differentiation stages and were under the regulation of muscle-specific genome-  
480 organizing NETs <sup>17</sup>. These genes (*NID1*, *VCAM1*, *PTN*, *HGF*, *EFNA5*, and *BDNF*) are critical  
481 for the timing and integrity of myotube fusion and need to be expressed early in myoblast  
482 differentiation but shut down later or they inhibit myogenesis <sup>51-55</sup>. All six genes were  
483 misregulated in at least 5 but none were affected in all patients (**Figure 4**). In general terms,  
484 these genes were upregulated in Group 1, downregulated in Group 3, and mixed in Group 2.  
485 All six genes were upregulated in Bakay's EDMD data, although only *NID1* and *HGF* were  
486 statistically significant at 5% FDR. Both were upregulated only in Group 1 and  
487 downregulated in Group 3. *PTN* showed a similar pattern of expression as *HGF* although the  
488 only statistically significant changes were for upregulation in Group 1.

489 Several myogenic signaling pathways were altered such as MAPK, PI3K, BMP and  
490 Notch signaling and several alternate differentiation pathways were de-repressed such as  
491 adipogenesis that could disrupt myotube formation and function (**Figure 2 and Table S3**).  
492 Myogenesis and adipogenesis are two distinct differentiation routes from the same  
493 progenitor cells and whichever route is taken the other becomes repressed during normal  
494 differentiation <sup>56; 57</sup>. We previously showed that knockout of fat- or muscle-specific genome  
495 organizing NETs yield de-repression of the alternate differentiation pathway <sup>17; 58</sup> and the  
496 Collas lab showed that Lamin A lipodystrophy point mutations yield de-repression of muscle  
497 differentiation genes in adipocytes <sup>59</sup>. We now find here that adipogenesis genes are  
498 upregulated in both Bakay's EDMD data and our data (**Figure 2**). This is especially  
499 prominent for the five patients in Group 1 while Group 3 showing strong downregulation of a

500 subset of the same genes and Group 2 broadly looking like an intermediate of the other two  
501 groups (**Figures 4 and S11-S12**), and thus could also contribute to the metabolic defect  
502 differences between patients.

503

504 *Splicing Pathways Uniformly Altered in EDMD Patients Yield Loss of Muscle-Specific Splice*  
505 *Variants*

506 Among the downregulated functional categories, mRNA splicing stood out with many genes  
507 uniformly downregulated in all patient samples (**Figures 2 and S13**). Because of that we  
508 decided to investigate various subcategories and we found that there was a striking and  
509 uniform upregulation of factors supporting alternative splicing while constitutive splicing  
510 factors involved in spliceosome assembly and cis splicing are downregulated (**Figures 5**  
511 **and S14**). Expression changes of as little as 10% ( $\log_2FC > 0.1$ ) have been shown to result  
512 in biologically relevant changes for vital proteins like kinases and splicing factors<sup>60</sup>. We thus  
513 assume that up- and down-regulation of whole spliceosome subcomplexes even in low  
514  $\log_2FC$  ranges lead to significant splicing misregulation. Notably, snRNAs of the U1  
515 spliceosomal subcomplex, responsible for 5' SS recognition, constitute as much as 20% of  
516 all downregulated splicing factors ( $\log_2FC > |0.1|$ , RNU1s and RNVU1s). Interestingly, a  
517 similar sharp cut-off between alternative and constitutive splicing has been reported in  
518 myotonic dystrophy (DM1/DM2) with similar genes being affected, namely *CELFs*, *MBNLs*,  
519 *NOVA*, *SMN1/2* and *SF3A1*, among others<sup>61</sup>. DM1 is one of the best studied splicing  
520 diseases and shares typical muscular dystrophy symptomology with EDMD. Moreover, a  
521 number of splicing changes in DM1 and DM2 also occur in other muscular dystrophies<sup>62</sup>. Of  
522 note, *MBNL3* is 4-fold transcriptionally upregulated in EDMD compared to controls. Its  
523 protein product impairs muscle cell differentiation in healthy muscle and thus needs to be  
524 downregulated upon differentiation onset<sup>63</sup>.

525         Next, we performed splicing analysis to determine whether mis-splicing could drive  
526 some of the pathway alterations observed in the EDMD samples. For this purpose, we used  
527 three different methods: DEXSeq analyses exon usage, rMATS provides information about

528 the five most common alternative splicing (AS) events and isoform Switch Analyzer (ISA)  
529 indicates which splicing events lead to annotated isoform switches. This revealed varying  
530 amounts of alternatively spliced genes in all samples and the three subgroups (**Figure 5**).  
531 Since every method focuses on a different event type/ aspect of splicing, a higher amount of  
532 unique than overlapping genes is to be expected. Accordingly, an overlap of all three  
533 methods indicates genes with exon skipping events that lead to annotated isoform switches.  
534 The numbers of mis-spliced genes overlapping between the three algorithms was only 1  
535 gene, *ZNF880*, in G1. In contrast, when analyzing Group 1, 2, and 3 separately, each patient  
536 grouping had many mis-spliced genes identified by all three algorithms with 18 mis-spliced  
537 genes in the intersect for Group 1, the group including half of the patients, and as much as  
538 95 in Group 3 (**Table S4**). These genes include Nesprin 3 (*SYNE3*), the splicing factor  
539 kinase *CLK1* and the chromatin regulator *HMGN3*, all of which are potentially contributing to  
540 EDMD, given their functions. All results can be found in **Table S5**. The rMATS analysis  
541 includes five AS events: exon skipping (SE), intron retention (RI), mutually exclusive exons  
542 (MXE), alternative 3' splice site (A3SS) and alternative 5' splice site (A5SS) usage. Using  
543 this comprehensive dataset, we searched for AS events that are significantly differentially  
544 used (percent-spliced-in-(psi)-value > |0.1| and p-value < 0.05, **Table S5**). Comparing AS  
545 event inclusion between control and EDMD samples, we find thrice as much intron retention  
546 in EDMD, while all other events are similarly included as excluded. We hypothesize that this  
547 could be a result of downregulated U1 snRNAs which are necessary for proper spliceosome  
548 assembly. Supporting the likely importance of the splicing pathway to the EDMD  
549 pathomechanism, pathway analysis on these genes revealed a strong enrichment for  
550 pathways associated with metabolism, gene expression and the cytoskeleton (**Figure 5**).  
551 Moreover, Group 1 and Group 3 display an enrichment for myogenesis and muscle  
552 contraction. Using a custom-made set of genes either specific or relevant for muscle  
553 development and structure (see methods), we then scanned all significant and differential  
554 AS events (**Figures 5 and S15**). Notably, mis-splicing led to the absence of many muscle-  
555 specific splice variants (**Figure 5**), among them vital muscle structural genes like *TTN*,

556 *TNNT3*, *NEB*, *ACTA4* and *OBSCN* as well as developmental regulators of the MEF2 family.  
557 Importantly, many of them are linked to a variety of muscular dystrophies. For example,  
558 *TTN*, *CAPN3*, *PLEC*, and *SGCA* are linked to Limb-Girdle muscular dystrophy<sup>64-69</sup>, *DMD* is  
559 linked to Duchenne Muscular Dystrophy and Becker muscular dystrophy<sup>70; 71</sup>, and *BIN1*,  
560 *TNNT2/3* and *MBNL1* are mis-spliced in myotonic dystrophy<sup>72</sup>.

561 Intriguingly, one of the mis-spliced genes which also displays an isoform switch in  
562 Group 3 is *TMEM38A* that has been linked to EDMD<sup>10</sup>. The altered splicing map for  
563 *TMEM38A* reveals that not only is its expression highly elevated in EDMD patients (log2FC  
564 = 2.9), but also that the protein-coding isoform displays a higher usage relative to  
565 abundance compared to the non-coding isoform (**Figure 5**) Many other notable mis-spliced  
566 genes are involved in myotube fusion such as the previously mentioned *NID1* that is under  
567 spatial genome positioning control of NET39, another of the genome organizing NETs  
568 causative of EDMD. Most compellingly, three mis-spliced genes having to do with  
569 myogenesis/ myotube fusion had muscle-specific splice variants absent in all patients (G1  
570 rMATS). These were *CLCC1* whose loss yields muscle myotonia<sup>73</sup>, *HLA-A/B* that  
571 disappears during myogenesis and is linked as a risk factor for idiopathic inflammatory  
572 myopathies<sup>74; 75</sup>, and *SMAD2* that shuts down myoblast fusion<sup>76</sup>. The above examples were  
573 found in all patients within a particular Group, but not always amongst all patients from the  
574 study or determined by all algorithms; however, there were also some mis-spliced genes  
575 that are potentially even more interesting because they were mis-spliced in all patients and  
576 with all 3 algorithms yielding the same results. One of these was *ZNF880*. While overall  
577 transcript numbers remained similar, the isoform predominantly expressed in control cells,  
578 ENST00000422689, is strongly downregulated in Group 1 while the shorter isoform,  
579 ENST00000600321, is strongly upregulated (**Figure 5**). Interestingly, the dominant isoform  
580 in EDMD loses the zinc finger domain (light and dark blue) and is left with the repressive  
581 KRAB domain (black). Little is known about *ZNF880* except that it has an unclear role in  
582 breast and rectal cancer<sup>77; 78</sup> and additional experiments are necessary to elucidate its role  
583 in EDMD.

584

585 *miRNA-Seq Analysis of EDMD Patient Cells*

586 Changes in miRNA levels have been observed in a number of muscular dystrophies and are  
587 often used as biomarkers<sup>79, 80</sup>, but a comprehensive investigation of miRNA levels in EDMD  
588 has thus far not been engaged. Thus, the *in vitro* differentiated EDMD patient cells used for  
589 the preceding analysis were also analyzed by miRNA-Seq. We identified 28 differentially  
590 expressed miRNAs with some variation among patients (**Figure 6**). We extracted their  
591 putative targets from the miRDB database (web resources) and selected those targets  
592 whose expression changed in the opposite direction of the miRNAs. Pathway analysis  
593 revealed misregulation of miRNAs largely associated with the same pathways that were  
594 misregulated from the RNA-Seq data e.g. metabolism, ECM/ fibrosis, and signaling/  
595 differentiation (**Figure 6 and Table S6**). More specifically for metabolism 9 of the  
596 misregulated miRNA were linked to metabolic functions and with only partial overlap another  
597 9 linked to mitochondria function, for ECM/ fibrosis 19 of the misregulated miRNAs were  
598 linked to ECM and again with only partial overlap 10 to fibrosis and 13 to cytokines and  
599 inflammation. As noted before the ECM category in addition to potentially contributing to  
600 fibrosis is also relevant for myotube fusion along with cell cycle regulation that was targeted  
601 by 13 misregulated miRNAs and myogenesis that was targeted by 5 miRNAs. Several  
602 misregulated miRNAs had functions relating to alternative differentiation pathways with 4  
603 relating to adipogenesis, 12 to neurogenesis, 17 to angiogenesis and for signaling there  
604 were 9 misregulated miRNAs affecting MAPK pathways, 8 for Akt signaling, 1 for JAK-STAT  
605 signaling, 5 for TGF-beta signaling, 2 for Notch signaling, and 3 for TLR signaling.  
606 Interestingly, some misregulated miRNAs were also reported as being linked to disease  
607 states such as miR-140-3p to dilated cardiomyopathy through its repressive effect on the  
608 integrin metalloproteinase gene *ADAM17*<sup>81</sup>. As well as working within cells, miRNAs are  
609 often detected within a circulating exosomal microvesicle population that can be harvested  
610 from blood serum. This makes them especially attractive as potential biomarkers when



611 compared to more invasive biopsies, but a much larger sample size together with more  
612 clinical information will be required to clarify these as biomarkers.

613

#### 614 *EDMD Gene Expression Signature Suggests Relationships to Other Muscular Dystrophies*

615 The earlier Bakay study analyzed patient samples from other muscular dystrophies for  
616 comparison to EDMD. We re-analyzed their data and used GSEA to determine how related  
617 the different muscular dystrophies are to our data. In order to visualize the results, for each  
618 disease we plotted the GSEA normalised enrichment score (NES) against the  $-\log_{10}(\text{p-value})$ .  
619 The higher on the y-axis the higher the confidence, while positive and negative  
620 correlations appearing to the right or to the left of the vertical, respectively. Thus, the further  
621 to the upper right the various Bakay disease sets are, the closer it is to the data derived from  
622 our set of 10 patients. When we looked at all patients as a single group, EDMD was the best  
623 match (**Figure 7**), with the highest score and lowest p-value (FDR 0.001). This indicates that  
624 despite the differences in the individual DE genes between the mature muscle data from  
625 Bakay's EDMD geneset and our early *in vitro* differentiation geneset, a clear EDMD gene  
626 expression signature was displayed in our 10 patients. The next best match is Limb-Girdle  
627 muscular dystrophy 2A (LGMD2A), which is particularly interesting because *LMNA*  
628 mutations also cause Limb-Girdle muscular dystrophy 2B (LGMD2B) and this was even  
629 further distal in pathway analysis signatures from both our EDMD and the Bakay EDMD  
630 patients than Fascioscapulohumeral muscular dystrophy (FSHD) and Duchenne Muscular  
631 Dystrophy (DMD) patients. The differences in gene signatures that broke down the 10  
632 patients into three EDMD patient subgroups could reflect an underlying cause of clinical  
633 disease spectrum or indicate that a group may not be adequately classified as EDMD.  
634 Therefore, we performed the same GSEA analysis on each subgroup separately. Group 1,  
635 which had both classic emerin and lamin A EDMD mutations showed an even better match  
636 with the Bakay EDMD group which was again very close to LGMD2A but also to DMD,  
637 Becker Muscular Dystrophy (BMD), FSHD and Limb-Girdle muscular dystrophy 2I (LGMD2I)  
638 (**Figure 7**). LGMD2B was still separate and closer to Juvenile Dermatomyositis (JDM). For



639 Group 2, none of the diseases matched at FDR 5%, although the Bakay EDMD set  
640 remained the most like our set. Interestingly, two diseases exhibited an anti-correlation:  
641 DMD and BMD, which are both caused by mutations in the dystrophin gene *DMD*. In  
642 contrast, Group 3 appeared to be the most distinct and in many ways opposite to Group 1,  
643 which is a pattern that was often observed in the functional gene subsets analyzed (**Figures**  
644 **S5-S11**). Group 3 was anticorrelated with EDMD and most of the other muscular  
645 dystrophies, while the neurogenic Amyotrophic Lateral Sclerosis (ALS) appeared as the best  
646 match, possibly suggesting a neuronal bias in this group (**Figure 7**). This is further  
647 supported by the appearance of axonal neuropathy, ataxia, undergrowth, and speech  
648 problems in one of the two patients from this group (patient 4, *SYNE1*; **Table 1**), while none  
649 of the others exhibited any signs of neuropathy.

650 The relationship of the patient Groups segregated by gene signatures to potential  
651 differences in clinical presentation is underscored by the functional pathways enriched in  
652 each group over the others (**Figure 7**). Group 1 showed a strong enrichment of pathways  
653 associated with ECM and fibrosis, such as interferon signaling, TNF signaling, ECM  
654 organization, ECM proteoglycans, integrin cell surface interactions, collagen formation, and  
655 signaling by PDGF all upregulated. Adipogenesis was also particularly promoted in Group 1  
656 compared to the others, and cardiac conduction defects were also highlighted. Group 2 was  
657 more uniquely associated with Hippo signaling and BMP2-WNT4-FOXO1 pathway and had  
658 fewer links to ECM and fibrosis. Group 3 was more uniquely associated with metabolism,  
659 particularly upregulation of oxidative phosphorylation, mitochondrial biogenesis, glucagon  
660 signaling pathway, gluconeogenesis, glycolysis and gluconeogenesis, metabolism, TP53  
661 regulates metabolic genes, and thermogenesis pathways. This would suggest that Group 1  
662 pathophysiology may have more characteristics of fibrosis and altered myofibers while  
663 Group 2 may have more differentiation or mechanosignaling defects and Group 3 more  
664 metabolic defects (**Figure 7**).

665 **Discussion**

666 Attempts to identify the EDMD pathomechanism or clinical biomarkers purely through gene  
667 expression signatures are limited because there is too little uniformity in differential gene  
668 expression between all patients. We therefore engaged a functional pathway analysis using  
669 *in vitro* differentiated myotubes derived from 10 unrelated EDMD patients with known  
670 mutations in 7 EDMD-linked genes. While it is difficult to detect many individual genes that  
671 were uniformly changed in all patients, we found many pathways that were affected in all  
672 patients. Thus, although different genes may have been targeted in different patients, the  
673 same functional pathway would be disrupted and thus yield a pathology with similar clinical  
674 features. Many pathways were disrupted when we re-analyzed data from the previously  
675 published Bakay study and we postulated that, as they just analyzed mutations in two of the  
676 over two dozen genes linked to EDMD, analyzing a larger set of linked genes might narrow  
677 down the number of pathways to highlight those most relevant to EDMD pathophysiology.  
678 Indeed, when we considered a wider set of patients with mutations in 7 different genes the  
679 set of affected pathways narrowed to the point that we could identify four likely umbrella  
680 pathways.

681         These four umbrella pathways all make sense for contributing to or even driving the  
682 EDMD pathomechanism<sup>82</sup>. Disruption of metabolism pathways from the gene expression  
683 analysis was consistent with the significantly reduced glycolysis and mitochondrial  
684 respiration output we showed in patient myoblasts compared to controls and it makes sense  
685 that this could lead to fatigue, weakness, and muscle atrophy. ECM changes and fibrosis  
686 pathways are consistent with pathology observed in EDMD and similarly could drive some of  
687 the initial pathology and, as fibrosis accumulates, contribute to disease progression. De-  
688 repression of genes from alternate differentiation pathways and defects in myogenesis  
689 through disrupted signaling pathways and cell cycle regulation could generate aberrant  
690 myotubes to yield pathology. Finally, the last disrupted pathway of splicing yields a loss of  
691 muscle-specific splice variants that could impact on all three preceding pathways.

692           There is much scope for intersection between the four highlighted pathways altered  
693 in all sampled EDMD patient cells. For example, amongst the de-repressed differentiation  
694 pathways was adipogenesis that could also impact on the metabolism pathway. Even  
695 amongst the few genes that were uniformly altered in all patients sampled, though not  
696 originally obvious, a more detailed reading of the literature leads to intersections with these  
697 pathways. For example, while the *MYH14* general upregulation did not make obvious sense  
698 for muscle defects since it is not part of the contractile machinery, it has been shown that a  
699 mutation in *MYH14* disrupts mitochondrial fission in peripheral neuropathy<sup>83</sup>. Thus, *MYH14*  
700 could potentially feed into the mitochondrial deficits noted in the patient cells. Many of the  
701 miRNAs found to be altered in the patients feed into several of these pathways. For  
702 example, miR-2392 that is increased in all patients downregulates oxidative phosphorylation  
703 in mitochondria<sup>84</sup> but at the same time also is reported to promote inflammation<sup>85</sup>. miR-140  
704 that is up in all groups has roles in fibrosis through collagen regulation<sup>86</sup>, is pro-adipogenic  
705<sup>87</sup>, and inhibits skeletal muscle glycolysis<sup>88</sup>. miRNAs can also be used potentially  
706 prognostically between the different groups as for example miR-146a is upregulated in  
707 Group 1, unchanged in Group 2, and downregulated in Group 3. This miRNA has a strong  
708 effect on inflammation and has been implicated in fibrosis in the heart<sup>89</sup>. Because there is  
709 so much functional overlap between miRNA targets and the pathways noted from the RNA-  
710 Seq analysis, it is unclear to what extent the gene expression changes observed could be  
711 indirect from the misregulated miRNAs. Nonetheless, there are 4 core functions targeted by  
712 multiple mechanisms that we argue are likely to be central to the core EDMD  
713 pathomechanism. Interestingly, the literature is filled with many examples of mutation or loss  
714 of different splicing factors causing muscle defects though no individual misspliced gene was  
715 identified as mediating these effects. Similarly, in myotonic dystrophy type 1 (DM1) there are  
716 many mis-spliced genes thought to contribute to the disease pathology<sup>72</sup>. For example, the  
717 splicing factor SRSF1 that is down in most patients is important for neuromuscular junction  
718 formation in mice<sup>90</sup>.

719           How so many genes become misregulated has not been experimentally proven, but  
720 for lamin, emerin, Sun1, nesprin, TMEM214 and PLPP7/NET39, the fact that mutations to all  
721 individually yield many hundreds of gene expression changes with considerable overlap  
722 strongly suggests that they function in a complex at the nuclear envelope to direct genome  
723 organization. It has already been shown that knockdown of Tmem214 and NET39 as well as  
724 several other muscle-specific NETs each alters the position and expression of hundreds of  
725 genes <sup>17</sup>. Separately it was found that lamin B1 and the NET LAP2beta function together  
726 with two other proteins in a complex involved in tethering genes to the nuclear envelope <sup>91</sup> in  
727 fibroblasts and that emerin and lamins similarly function together with other proteins to tether  
728 genes in muscle cells <sup>92</sup>. Thus, disruption of emerin, lamin A or any other component of  
729 these tethering complexes could yield sufficiently similar gene/ pathway expression changes  
730 to yield the core characteristic clinical features of EDMD. We propose that the different  
731 muscle-specific NETs give specificity to such a complex containing lamin A and emerin and  
732 that Sun1 and nesprin proteins can impact on these complexes through mediating  
733 mechanosignal transduction and FHL1 in interpreting such signals. Since 15% of all genes  
734 changing here were affected by at least one of the muscle-specific genome-organizing NETs  
735 that were tested by knockdown, this would provide a core set of genome organization and  
736 expression changes to cause the core EDMD pathology. Since the majority of genes  
737 affected by each NET tested was unique to that NET with the exception of Tmem214, this  
738 could account for other gene expression changes that drive the segregation into subgroups  
739 which could contribute to clinical variation. This interpretation is consistent with the numbers  
740 of genes changing for mutations in different nuclear envelope proteins (**Figure 1**). The  
741 patient cells with mutations in genome organizing NETs had much fewer genes changing  
742 than the patient cells with lamin A mutations. This could be because the lamin A mutations  
743 could disrupt multiple genome tethering complexes for different genome organizing NETs  
744 and thus alter expression of more genes. Alternatively, different lamin A mutations could  
745 preferentially yield disruption of complexes with particular genome-organizing NETs and  
746 thus patients with the same complex disrupted might share gene expression signature

747 changes while those with different complexes disrupted might have less overlap so that this  
748 could account for different lamin A mutations segregating into different gene expression  
749 subgroups. In either case, the extreme differences in lamin A mutations gene expression  
750 profiles is not entirely surprising as different lamin mutations also exhibited large differences  
751 in studies of nuclear mechanics<sup>93</sup>; so this could also impact on mechanosignal transduction.  
752 The Sun1 mutation may have affected fewer genes because its function in mechanosignal  
753 transduction is redundant with Sun2 while the Nesprin 1 mutation had more genes changing  
754 because it is more central to both mechanosignal transduction and to cell and nuclear  
755 mechanical stability.

756 The FHL1 mutations add another level of complexity to EDMD as there are several  
757 splice variants of FHL1 and only the B variant (ENST00000394155) targets to the nuclear  
758 envelope<sup>94</sup>. That EDMD is a nuclear envelope disorder is underscored by the fact that none  
759 of the FHL1 mutations occur in exons found in the much shorter C variant  
760 (ENST00000618438) and the patient 8 mutation p.V280M is in an exon unique to FHL1B.  
761 Thus, the nuclear envelope splice variant is the only one that could yield pathology in all  
762 patients, though some of the variation could come from one of the patients also expressing  
763 the mutant A splice variant (ENST00000543669).

764

## 765 **Conclusions**

766 While further work is needed to validate the correlations between the gene  
767 expression profile subgroupings and their clinical presentation and disease progression, our  
768 finding of such distinct gene expression signatures amongst clinically diagnosed EDMD  
769 patients argues that the currently used clinical phenotype spectrum umbrella of the EDMD  
770 classification may be too broad and it might be reclassified in more precise subtypes. What  
771 is clear is that the original classifications of EDMD subtypes based just on the mutated gene  
772 often allows for cases with very dissimilar gene signatures to be classified together while  
773 similar gene signature cases are classified as separate classes. The two lamin A mutations  
774 yielded changes in gene expression signatures that were far more different from one another

775 than the group 1 lamin A mutation gene signature was from the TMEM214, NET39, emerin,  
776 and FHL1 mutation gene signatures. Similarly, the three FHL1 mutations yielded greater  
777 differences between them than these many genes in Groups 1 and 2. Thus, EDMD might be  
778 better classified by similarities in gene expression signatures than by the particular gene  
779 mutated. Regardless, these subtypes or separate disorders have distinctive gene expression  
780 signatures and miRNA signatures that could be used as biomarkers both diagnostically and  
781 perhaps prognostically. To get to that point will require a more comprehensive modern  
782 description of clinical Gestalt phenotypes including e.g.: imaging datasets and disease  
783 progression timelines deciphering unique groups. Importantly, the different pathways we  
784 found enriched for in each subgroup could be converted to clinical recommendations based  
785 on the much more conserved individual gene expression changes for each subgroup  
786 (**Figure 7**). For example, EDMD patients have been considered by some clinicians to be at  
787 risk for malignant hyperthermia<sup>95</sup>, though a consensus was never achieved. Our data show  
788 that the 3 genes currently associated with malignant hyperthermia (*RYR1*, *CACNA1S*, and  
789 *STAC3*) are all misregulated in Groups 1 and 3, but not Group 2 (**Figure S16**). Thus,  
790 checking expression of these genes might indicate whether a patient is likely to be at risk or  
791 not. Finally, an additional new aspect coming up from our datasets is that it might be worth  
792 further investigating the role of splicing in muscle differentiation because it might be of wider  
793 relevance to muscular dystrophy beyond DM and EDMD.

794

#### 795 **Data availability**

796 Bakay *et al.* muscular dystrophy dataset is available at NCBI GEO with accession GSE3307.  
797 RNA-Seq and miRNA-Seq datasets will be deposited at NCBI GEO and made publicly  
798 available prior to publication.

799

#### 800 **Acknowledgements**

801 This work was funded by Muscular Dystrophy UK 18GRO-PG24-0248 and Medical  
802 Research Council MR/R018073 to ECS and Deutsche Forschungsgemeinschaft (DFG,  
803 German Research Foundation) – Projektnummer 470092532 to PM.

804

#### 805 **Web resources**

806 g:Profiler, <https://biit.cs.ut.ee/gprofiler/gost>

807 TissueEnrich, <https://tissueenrich.gdc.broadinstitute.edu/>

808 miRDB, <http://mirdb.org>

809 'smrnaseq' miRNA-Seq analysis pipeline, <https://nf-co.re/smrnaseq/1.1.0>

810 miRTop, <https://github.com/miRTop>

811 NCBI GEO, <https://www.ncbi.nlm.nih.gov/geo/>

812

#### 813 **Author Contributions**

814 JIH processed patient samples for RNA- and miRNA-Seq and analyzed the data with  
815 assistance from SW. VT performed splicing analysis. LK-B, SH, and PM performed various  
816 metabolic analyses. RC helped with generation of figures and critical discussion. BS  
817 provided patient samples and inspiration. ECS designed the study and wrote the manuscript.

818 **References**

819

- 820 1. Norwood, F.L.M., Harling, C., Chinnery, P.F., Eagle, M., Bushby, K., and Straub, V.  
821 (2009). Prevalence of genetic muscle disease in Northern England: in-depth analysis  
822 of a muscle clinic population *Brain* 132, 3175-3186.
- 823 2. Bonne, G., Mercuri, E., Muchir, A., Urtizbera, A., Becane, H.M., Recan, D., Merlini, L.,  
824 Wehnert, M., Boor, R., Reuner, U., et al. (2000). Clinical and molecular genetic  
825 spectrum of autosomal dominant Emery-Dreifuss muscular dystrophy due to  
826 mutations of the lamin A/C gene. *Ann Neurol* 48, 170-180.
- 827 3. Mercuri, E., Poppe, M., Quinlivan, R., Messina, S., Kinali, M., Demay, L., Bourke, J.,  
828 Richard, P., Sewry, C., Pike, M., et al. (2004). Extreme variability of phenotype in  
829 patients with an identical missense mutation in the lamin A/C gene: from congenital  
830 onset with severe phenotype to milder classic Emery-Dreifuss variant. *Arch Neurol*  
831 61, 690-694.
- 832 4. Rankin, J., Auer-Grumbach, M., Bagg, W., Colclough, K., Nguyen, T.D., Fenton-May, J.,  
833 Hattersley, A., Hudson, J., Jardine, P., Josifova, D., et al. (2008). Extreme  
834 phenotypic diversity and nonpenetrance in families with the LMNA gene mutation  
835 R644C. *Am J Med Genet A* 146A, 1530-1542.
- 836 5. Hoeltzenbein, M., Karow, T., Zeller, J.A., Warzok, R., Wulff, K., Zschesche, M.,  
837 Herrmann, F.H., Grosse-Heitmeyer, W., and Wehnert, M.S. (1999). Severe clinical  
838 expression in X-linked Emery-Dreifuss muscular dystrophy. *Neuromuscul Disord* 9,  
839 166-170.
- 840 6. Emery, A.E., and Dreifuss, F.E. (1966). Unusual type of benign x-linked muscular  
841 dystrophy. *J Neurol Neurosurg Psychiatry* 29, 338-342.
- 842 7. Emery, A.E. (1989). Emery-Dreifuss syndrome. *J Med Genet* 26, 637-641.
- 843 8. Knoblauch, H., Geier, C., Adams, S., Budde, B., Rudolph, A., Zacharias, U., Schulz-  
844 Menger, J., Spuler, A., Yaou, R.B., Nurnberg, P., et al. (2010). Contractures and  
845 hypertrophic cardiomyopathy in a novel FHL1 mutation. *Ann Neurol* 67, 136-140.



- 846 9. Bonne, G., and Quijano-Roy, S. (2013). Emery-Dreifuss muscular dystrophy,  
847 laminopathies, and other nuclear envelopopathies. *Handb Clin Neurol* 113, 1367-1376.
- 848 10. Meinke, P., Kerr, A.R.W., Czapiewski, R., de Las Heras, J.I., Dixon, C.R., Harris, E.,  
849 Kolbel, H., Muntoni, F., Schara, U., Straub, V., et al. (2020). A multistage sequencing  
850 strategy pinpoints novel candidate alleles for Emery-Dreifuss muscular dystrophy  
851 and supports gene misregulation as its pathomechanism. *EBioMedicine* 102587,  
852 doi10.1016.
- 853 11. Meinke, P. (2018). *Molecular Genetics of Emery–Dreifuss Muscular Dystrophy*. eLS  
854 <https://doi.org/10.1002/9780470015902.a0022438.pub2>.
- 855 12. Bridger, J.M., Foeger, N., Kill, I.R., and Herrmann, H. (2007). The nuclear lamina. Both a  
856 structural framework and a platform for genome organization. *FEBS J* 274, 1354-  
857 1361.
- 858 13. Worman, H.J., and Bonne, G. (2007). "Laminopathies": a wide spectrum of human  
859 diseases. *Exp Cell Res* 313, 2121-2133.
- 860 14. Meinke, P., Mattioli, E., Haque, F., Antoku, S., Columbaro, M., Straatman, K.R.,  
861 Worman, H.J., Gundersen, G.G., Lattanzi, G., Wehnert, M., et al. (2014). Muscular  
862 dystrophy-associated SUN1 and SUN2 variants disrupt nuclear-cytoskeletal  
863 connections and myonuclear organization. *PLoS Genet* 10, e1004605.
- 864 15. Zhang, Q., Bethmann, C., Worth, N.F., Davies, J.D., Wasner, C., Feuer, A., Ragnauth,  
865 C.D., Yi, Q., Mellad, J.A., Warren, D.T., et al. (2007). Nesprin-1 and -2 are involved  
866 in the pathogenesis of Emery-Dreifuss Muscular Dystrophy and are critical for  
867 nuclear envelope integrity. *Hum Mol Genet.* 16, 2816-2833.
- 868 16. Piccus, R., and Brayson, D. (2020). The nuclear envelope: LINCing tissue mechanics to  
869 genome regulation in cardiac and skeletal muscle. *Biol Lett* 16, 20200302.
- 870 17. Robson, M.I., de Las Heras, J.I., Czapiewski, R., Le Thanh, P., Booth, D.G., Kelly, D.A.,  
871 Webb, S., Kerr, A.R., and Schirmer, E.C. (2016). Tissue-Specific Gene Repositioning  
872 by Muscle Nuclear Membrane Proteins Enhances Repression of Critical  
873 Developmental Genes during Myogenesis. *Mol Cell* 62, 834-847.

- 874 18. Wilkie, G.S., Korfali, N., Swanson, S.K., Malik, P., Srsen, V., Batrakou, D.G., de las  
875 Heras, J., Zuleger, N., Kerr, A.R., Florens, L., et al. (2011). Several novel nuclear  
876 envelope transmembrane proteins identified in skeletal muscle have cytoskeletal  
877 associations. *Mol Cell Proteomics* 10, M110 003129.
- 878 19. Zuleger, N., Boyle, S., Kelly, D.A., de Las Heras, J.I., Lazou, V., Korfali, N., Batrakou,  
879 D.G., Randles, K.N., Morris, G.E., Harrison, D.J., et al. (2013). Specific nuclear  
880 envelope transmembrane proteins can promote the location of chromosomes to and  
881 from the nuclear periphery. *Genome Biol* 14, R14.
- 882 20. Bakay, M., Wang, Z., Melcon, G., Schiltz, L., Xuan, J., Zhao, P., Sartorelli, V., Seo, J.,  
883 Pegoraro, E., Angelini, C., et al. (2006). Nuclear envelope dystrophies show a  
884 transcriptional fingerprint suggesting disruption of Rb-MyoD pathways in muscle  
885 regeneration. *Brain* 129, 996-1013.
- 886 21. Melcon, G., Kozlov, S., Cutler, D.A., Sullivan, T., Hernandez, L., Zhao, P., Mitchell, S.,  
887 Nader, G., Bakay, M., Rottman, J.N., et al. (2006). Loss of emerin at the nuclear  
888 envelope disrupts the Rb1/E2F and MyoD pathways during muscle regeneration.  
889 *Hum Mol Genet* 15, 637-651.
- 890 22. Bione, S., Maestrini, E., Rivella, S., Mancini, M., Regis, S., Romeo, G., and Toniolo, D.  
891 (1994). Identification of a novel X-linked gene responsible for Emery-Dreifuss  
892 muscular dystrophy. *Nat Genet* 8, 323-327.
- 893 23. Bonne, G., Di Barletta, M.R., Varnous, S., Becane, H.M., Hammouda, E.H., Merlini, L.,  
894 Muntoni, F., Greenberg, C.R., Gary, F., Urtizbera, J.A., et al. (1999). Mutations in  
895 the gene encoding lamin A/C cause autosomal dominant Emery- Dreifuss muscular  
896 dystrophy. *Nat Genet* 21, 285-288.
- 897 24. Gueneau, L., Bertrand, A.T., Jais, J.P., Salih, M.A., Stojkovic, T., Wehnert, M.,  
898 Hoeltzenbein, M., Spuler, S., Saitoh, S., Verschueren, A., et al. (2009). Mutations of  
899 the FHL1 gene cause Emery-Dreifuss muscular dystrophy. *Am J Hum Genet* 85,  
900 338-353.

- 901 25. Ruiz, E., Penrose, H.M., Heller, S., Nakhoul, H., Baddoo, M., Flemington, E.F., Kandil,  
902 E., and Savkovic, S.D. (2020). Bacterial TLR4 and NOD2 signaling linked to reduced  
903 mitochondrial energy function in active inflammatory bowel disease. *Gut Microbes*  
904 11, 350-363.
- 905 26. Campbell, I.L., Bizilj, K., Colman, P.G., Tuck, B.E., and Harrison, L.C. (1986). Interferon-  
906 gamma induces the expression of HLA-A,B,C but not HLA-DR on human pancreatic  
907 beta-cells. *J Clin Endocrinol Metab* 62, 1101-1109.
- 908 27. Browne, S.K., Roesser, J.R., Zhu, S.Z., and Ginder, G.D. (2006). Differential IFN-gamma  
909 stimulation of HLA-A gene expression through CRM-1-dependent nuclear RNA  
910 export. *J Immunol* 177, 8612-8619.
- 911 28. Behrends, C., Sowa, M.E., Gygi, S.P., and Harper, J.W. (2010). Network organization of  
912 the human autophagy system. *Nature* 466, 68-76.
- 913 29. Choi, B.-O., Kang, S.H., Hyun, Y.S., Kanwal, S., Park, S.W., Koo, H., Kim, S.-B., Choi,  
914 Y.-C., Yoo, J.H., Kim, J.-W., et al. (2011). A complex phenotype of peripheral  
915 neuropathy, myopathy, hoarseness, and hearing loss is linked to an autosomal  
916 dominant mutation in MYH14. *Hum Mutat* 32, 669-677.
- 917 30. Iyadurai, S., Arnold, D.A., Kissel, J.T., Ruhno, C., McGovern, V.L., Snyder, P.J., Prior,  
918 T.W., Roggenbuck, J., Burghes, A.H., and Kolb, S.J. (2017). Variable phenotypic  
919 expression and onset in MYH14 distal hereditary motor neuropathy phenotype in a  
920 large, multigenerational North American family. *Muscle Nerve* 56, 341-345.
- 921 31. Almutawa, W., Smith, C., Sabouny, R., Smit, R.B., Zhao, T., Wong, R., Lee-Glover, L.,  
922 Desrochers-Goyette, J., Ilamathi, H.S., Consortium, C.R.C., et al. (2019). The R941L  
923 mutation in MYH14 disrupts mitochondrial fission and associates with peripheral  
924 neuropathy. *EBioMedicine* 45, 379-392.
- 925 32. Raudvere, U., Kolberg, L., Kuzmin, I., Arak, T., Adler, P., Peterson, H., and Vilo, J.  
926 (2019). g:Profiler: a web server for functional enrichment analysis and conversions of  
927 gene lists (2019 update). *Nucleic Acids Res* 47, W191-W198.

- 928 33. Supek, F., Bosnjak, M., Skunca, N., and Smuc, T. (2011). REVIGO summarizes and  
929 visualizes long lists of gene ontology terms. *PLoS One* 6, e21800.
- 930 34. Fisk, B., Ioannides, C.G., Aggarwal, S., Wharton, J.T., O'Brian, C.A., Restifo, N., and  
931 Glisson, B.S. (1994). Enhanced expression of HLA-A,B,C and inducibility of TAP-1,  
932 TAP-2, and HLA-A,B,C by interferon-gamma in a multidrug-resistant small cell lung  
933 cancer line. *Lymphokine Cytokine Res* 13, 125-131.
- 934 35. Subramanian, A., Tamayo, P., Mootha, V.K., Mukherjee, S., Ebert, B.L., Gillette, M.A.,  
935 Paulovich, A., Pomeroy, S.L., Golub, T.R., Lander, E.S., et al. (2005). Gene set  
936 enrichment analysis: a knowledge-based approach for interpreting genome-wide  
937 expression profiles. *Proc Natl Acad Sci U S A* 102, 15545-15550.
- 938 36. Liberzon, A., Subramanian, A., Pinchback, R., Thorvaldsdóttir, H., Tamayo, P., and  
939 Mesirov, J.P. (2011). Molecular signatures database (MSigDB) 3.0. *Bioinformatics*  
940 27, 1739-1740.
- 941 37. Miranda, S., Foncea, R., Guerrero, J., and Leighton, F. (1999). Oxidative Stress and  
942 Upregulation of Mitochondrial Biogenesis Genes in Mitochondrial DNA-Depleted  
943 HeLa Cells. *Biochem Biophys Res Commun* 258, 44-49.
- 944 38. L'honore, A., Commere, P.-H., Negroni, E., Pallafacchina, G., Friguet, B., Drouin, J.,  
945 Buckingham, M., and Montarras, D. (2018). The role of Pitx2 and Pitx3 in muscle  
946 stem cells gives new insights into P38a MAP kinase and redox regulation of muscle  
947 regeneration. *Elife* 7, e32991.
- 948 39. Chang, N.C., Nguyen, M., and Shore, G.C. (2012). BCL2-CISD2: An ER complex at the  
949 nexus of autophagy and calcium homeostasis? *Autophagy* 8, 856-857.
- 950 40. Yeh, C.-H., Chou, Y.-J., Kao, C.-H., and Tsai, T.-F. (2020). Mitochondria and Calcium  
951 Homeostasis: Cisd2 as a Big Player in Cardiac Ageing. *Int J Mol Sci* 21, 9238.
- 952 41. Meinke, P., Schneiderat, P., Srsen, V., Korfali, N., Le Thanh, P., Cowan, G.J.M.,  
953 Cavanagh, D.R., Wehnert, M., Schirmer, E.C., and Walter, M.C. (2015). Abnormal  
954 proliferation and spontaneous differentiation of myoblasts from a symptomatic female

- 955 carrier of X-linked Emery-Dreifuss muscular dystrophy. *Neuromuscul Disord* 25, 127-  
956 136.
- 957 42. Jöbssis, G.J., Keizers, H., Vreijling, J.P., de Visser, M., Speer, M.C., Wolterman, R.A.,  
958 Baas, F., and Bolhuis, P.A. (1996). Type VI collagen mutations in Bethlem myopathy,  
959 an autosomal dominant myopathy with contractures. *Nat Genet* 14, 113-115.
- 960 43. Lampe, A.K., Dunn, D.M., von Niederhausern, A.C., Hamil, C., Aoyagi, A., Laval, S.H.,  
961 Marie, S.K., Chu, M.-L., Swoboda, K., Muntoni, F., et al. (2005). Automated genomic  
962 sequence analysis of the three collagen VI genes: applications to Ullrich congenital  
963 muscular dystrophy and Bethlem myopathy. *J Med Genet* 42, 108-120.
- 964 44. Baker, N.L., Morgelin, M., Pace, R.A., Peat, R.A., Adams, N.E., McKinlay Gardner, R.J.,  
965 Rowland, L.P., Miller, G., De Jonghe, P., Ceulemans, B., et al. (2007). Molecular  
966 consequences of dominant Bethlem myopathy collagen VI mutations. *Ann Neurol* 62,  
967 390-405.
- 968 45. Zou, Y., Zwolanek, D., Izu, Y., Gandhi, S., Schreiber, G., Brockmann, K., Devoto, M.,  
969 Tian, Z., Hu, Y., Veit, G., et al. (2014). Recessive and dominant mutations in  
970 COL12A1 cause a novel EDS/myopathy overlap syndrome in humans and mice.  
971 *Hum Mol Genet* 23, 2339-2352.
- 972 46. Kaar, J.L., Li, Y., Blair, H.C., Asche, G., Koepsel, R.R., Huard, J., and Russell, A.J.  
973 (2008). Matrix metalloproteinase-1 treatment of muscle fibrosis. *Acta Biomater* 4,  
974 1141-1120.
- 975 47. Zhu, X., Yao, T., Wang, R., Guo, S., Wang, X., Zhou, Z., Zhang, Y., Zhuo, X., Wang, R.,  
976 Li, J.Z., et al. (2020). IRF4 in Skeletal Muscle Regulates Exercise Capacity via  
977 PTG/Glycogen Pathway. *Adv Sci (Weinh)* 7, 2001502.
- 978 48. Chiba, K., Tsuchiya, M., Koide, M., Hagiwara, Y., Sasaki, K., Hattori, Y., Watanabe, M.,  
979 Sugawara, S., Kanzaki, M., and Endo, Y. (2015). Involvement of IL-1 in the  
980 Maintenance of Masseter Muscle Activity and Glucose Homeostasis *PLoS One* 10,  
981 e0143635.

- 982 49. Fairley, E., Riddell, A., Ellis, J., and Kendrick-Jones, J. (2002). The cell cycle dependent  
983 mislocalisation of emerin may contribute to the Emery-Dreifuss muscular dystrophy  
984 phenotype. *J Cell Sci* 115, 341-354.
- 985 50. Mademtzoglou, D., Asakura, Y., Borok, M.J., Alonso-Martin, S., Mourikis, P., Kodaka, Y.,  
986 Mohan, A., Asakura, A., and Relaix, F. (2018). Cellular localization of the cell cycle  
987 inhibitor Cdkn1c controls growth arrest of adult skeletal muscle stem cells. *eLife* 7,  
988 e33337.
- 989 51. Caruelle, D., Mazouzi, Z., Husmann, I., Delbe, J., Duchesnay, A., Gautron, J., Martelly,  
990 I., and Courty, J. (2004). Upregulation of HARP during in vitro myogenesis and rat  
991 soleus muscle regeneration. *J Muscle Res Cell Motility* 25, 45-53.
- 992 52. Dietrich, S., Abou-Rebyeh, F., Brohmann, H., Bladt, F., Sonnenberg-Riethmacher, E.,  
993 Yamaai, T., Lumsden, A., Brand-Saberi, B., and Birchmeier, C. (1999). The role of  
994 SF/HGF and c-Met in the development of skeletal muscle. *Development* 126, 1621-  
995 1629.
- 996 53. Mousavi, K., and Jasmin, B.J. (2006). BDNF is expressed in skeletal muscle satellite  
997 cells and inhibits myogenic differentiation. *J Neurosci* 26, 5739-5749.
- 998 54. Peng, H.B., Ali, A.A., Dai, Z., Daggett, D.F., Raulo, E., and Rauvala, H. (1995). The role  
999 of heparin-binding growth-associated molecule (HB-GAM) in the postsynaptic  
1000 induction in cultured muscle cells. *J Neurosci* 15, 3027-3038.
- 1001 55. Stark, D.A., Karvas, R.M., Siegel, A.L., and Cornelison, D.D. (2011). Eph/ephrin  
1002 interactions modulate muscle satellite cell motility and patterning. *Development* 138,  
1003 5279-5289.
- 1004 56. Singh, R., Artaza, J.N., Taylor, W.E., Gonzalez-Cadavid, N.F., and Bhasin, S. (2003).  
1005 Androgens stimulate myogenic differentiation and inhibit adipogenesis in C3H 10T1/2  
1006 pluripotent cells through an androgen receptor-mediated pathway. *Endocrinology*  
1007 144, 5081-5088.
- 1008 57. Bryan, B.A., Mitchell, D.C., Zhao, L., Ma, W., Stafford, L.J., Teng, B.-B., and Liu, M.  
1009 (2005). Modulation of muscle regeneration, myogenesis, and adipogenesis by the

- 1010 Rho family guanine nucleotide exchange factor GEFT. *Mol Cell Biol* 25, 11089-  
1011 11101.
- 1012 58. Czapiewski, R., Batrakou, D.G., de Las Heras, J.I., Carter, R., Sivakumar, A., Sliwinska,  
1013 M., Dixon, C.R., Webb, S., Lattanzi, G., Morton, N., et al. (2022). Genomic loci  
1014 mispositioning in Tmem120a knockout mice yields latent lipodystrophy. *Nat Commun*  
1015 13, 321 doi: 310.1038/s41467-41021-27869-41462.
- 1016 59. Oldenburg, A.R., Delbarre, E., Thiede, B., Vigouroux, C., and Collas, P. (2014).  
1017 Deregulation of Fragile X-related protein 1 by the lipodystrophic lamin A p.R482W  
1018 mutation elicits a myogenic gene expression program in preadipocytes. *Hum Mol*  
1019 *Genet* 23, 1151-1162.
- 1020 60. Anczuków, O., Rosenberg, A.Z., Akerman, M., Das, S., Zhan, L., Karni, R., K., M.S., and  
1021 Krainer, A.R. (2012). The splicing factor SRSF1 regulates apoptosis and proliferation  
1022 to promote mammary epithelial cell transformation. *Nat Struct Mol Biol* 19, 220-228.
- 1023 61. Todorow, V., Hintze, S., Kerr, A.R.W., Hehr, A., Schoser, B., and Meinke, P. (2021).  
1024 Transcriptome Analysis in a Primary Human Muscle Cell Differentiation Model for  
1025 Myotonic Dystrophy Type 1. *Int J Mol Sci* 22, 8607.
- 1026 62. Bachinski, L.L., Baggerly, K.A., Neubauer, V.L., Nixon, T.J., Raheem, O., Sirito, M.,  
1027 Unruh, A.K., Zhang, J., Nagarajan, L., Timchenko, L.T., et al. (2014). Most  
1028 expression and splicing changes in myotonic dystrophy type 1 and type 2 skeletal  
1029 muscle are shared with other muscular dystrophies. *Neuromuscul Disord* 24, 227-  
1030 240.
- 1031 63. Lee, K.-S., Cao, Y., Witwicka, H.E., Tom, S., Tapscott, S.J., and Wang, E.H. (2010).  
1032 RNA-binding protein Muscleblind-like 3 (MBNL3) disrupts myocyte enhancer factor 2  
1033 (Mef2) {beta}-exon splicing. *J Biol Chem* 285, 33779-33787.
- 1034 64. Hackman, P., Vihola, A., Haravuori, H., Marchand, S., Sarparanta, J., De Seze, J.,  
1035 Labeit, S., Witt, C., Peltonen, L., Richard, I., et al. (2002). Tibial muscular dystrophy  
1036 is a titinopathy caused by mutations in TTN, the gene encoding the giant skeletal-  
1037 muscle protein titin. *Am J Hum Genet* 71, 492-500.

- 1038 65. Penisson-Besnier, I., Hackman, P., Suominen, T., Sarparanta, J., Huovinen, S., Richard-  
1039 Cremieux, I., and Udd, B. (2010). Myopathies caused by homozygous titin mutations:  
1040 Limb-girdle muscular dystrophy 2J and variations of phenotype. *J Neurol Neurosurg*  
1041 *Psychiatry* 81, 1200-1202.
- 1042 66. Gundesli, H., Talim, B., Korkusuz, P., Balci-Hayta, B., Cirak, S., Akarsu, N.A., Topaloglu,  
1043 H., and Dincer, P. (2010). Mutation in exon 1f of PLEC, leading to disruption of  
1044 plectin isoform 1f, causes autosomal-recessive limb-girdle muscular dystrophy. *Am J*  
1045 *Hum Genet* 87, 834-841.
- 1046 67. Richard, I., Broux, O., Allamand, V., Fougousse, F., Chiannikulchai, N., Bourg, N.,  
1047 Brenguier, L., Devaud, C., Pasturaud, P., Roudaut, C., et al. (1995). Mutations in the  
1048 proteolytic enzyme calpain 3 cause limb-girdle muscular dystrophy type 2A. *Cell* 81,  
1049 27-40.
- 1050 68. Vissing, J., Barresi, R., Witting, N., Van Ghelue, M., Gammelgaard, L., Bindoff, L.A.,  
1051 Straub, V., Lochmuller, H., Hudson, J., Wahl, C.M., et al. (2016). A heterozygous 21-  
1052 bp deletion in CAPN3 causes dominantly inherited limb girdle muscular dystrophy  
1053 *Brain* 139, 2154-2163.
- 1054 69. Roberds, S.L., Leturcq, F., Allamand, V., Piccolo, F., Jeanpierre, M., Anderson, R.D.,  
1055 Lim, L.E., Lee, J.C., Tome, F.M., Romero, N.B., et al. (1994). Missense mutations in  
1056 the adhalin gene linked to autosomal recessive muscular dystrophy. *Cell* 78, 625-  
1057 633.
- 1058 70. Hoffman, E.P., Brown Jr, R.H., and Kunkel, L.M. (1987). Dystrophin: the protein product  
1059 of the Duchenne muscular dystrophy locus. *Cell* 51, 919-928.
- 1060 71. Kunkel, L.M., Hejtmancik, J.F., Caskey, C.T., Speer, A., Monaco, A.P., Middlesworth,  
1061 W., Colletti, C.A., Bertelson, C., Muller, U., Bresnan, M., et al. (1986). Analysis of  
1062 deletions in DNA from patients with Becker and Duchenne muscular dystrophy.  
1063 *Nature* 322, 73-77.



- 1064 72. López-Martínez, A., Soblechero-Martín, P., de-la-Puente-Ovejero, L., Nogales-Gadea,  
1065 G., and Arechavala-Gomez, V. (2020). An Overview of Alternative Splicing Defects  
1066 Implicated in Myotonic Dystrophy Type I. *Genes* 11, 1109.
- 1067 73. Jia, Y., Jucius, T.J., Cook, S.A., and Ackerman, S.L. (2015). Loss of Clcc1 results in ER  
1068 stress, misfolded protein accumulation, and neurodegeneration. *J Neurosci* 35, 3001-  
1069 3009.
- 1070 74. Isa, A., Nehlin, J.O., Sabir, H.J., Andersen, T.E., Gaster, M., Kassem, M., and Barington,  
1071 T. (2010). Impaired cell surface expression of HLA-B antigens on mesenchymal stem  
1072 cells and muscle cell progenitors. *PLoS One* 5, e10900.
- 1073 75. O'Hanlon, T.P., Carrick, D.M., Targoff, I.N., Arnett, F.C., Reveille, J.D., Carrington, M.,  
1074 Gao, X., Oddis, C.V., Morel, P.A., Malley, J.D., et al. (2006). Immunogenetic risk and  
1075 protective factors for the idiopathic inflammatory myopathies: distinct HLA-A, -B, -Cw,  
1076 -DRB1, and -DQA1 allelic profiles distinguish European American patients with  
1077 different myositis autoantibodies. *Medicine* 85, 111-127.
- 1078 76. Melendez, J., Sieiro, D., Salgado, D., Morin, V., Dejardin, M.-J., Zhou, C., Mullen, A.C.,  
1079 and Marcelle, C. (2021). TGF $\beta$  signalling acts as a molecular brake of myoblast  
1080 fusion. *Nat Commun* 12, 749.
- 1081 77. Yue, L., Wentao, L., Xin, Z., Jingjing, H., Xiaoyan, Z., Na, F., Tonghui, M., and Dalin, L.  
1082 (2020). Human epidermal growth factor receptor 2-positive metastatic breast cancer  
1083 with novel epidermal growth factor receptor -ZNF880 fusion and epidermal growth  
1084 factor receptor E114K mutations effectively treated with pyrotinib: A case report.  
1085 *Medicine (Baltimore)* 99, e23406.
- 1086 78. Bala, P., Singh, A.K., Kavadiyala, P., Kotapalli, V., Sabarinathan, R., and Bashyam,  
1087 M.D. (2021). Exome sequencing identifies ARID2 as a novel tumor suppressor in  
1088 early-onset sporadic rectal cancer. *Oncogene* 40, 863-874.
- 1089 79. Cacchiarelli, D., Legnini, I., Martone, J., Cazzella, V., D'Amico, A., Bertini, E., and  
1090 Bozzoni, I. (2011). miRNAs as serum biomarkers for Duchenne muscular dystrophy.  
1091 *EMBO Mol Med* 3, 258-265.

- 1092 80. Israeli, D., Poupiot, J., Amor, F., Charton, K., Lostal, W., Jeanson-Leh, L., and Richard, I.  
1093 (2016). Circulating miRNAs are generic and versatile therapeutic monitoring  
1094 biomarkers in muscular dystrophies. *Sci Rep* 6, 28097.
- 1095 81. Fedak, P.W.M., Moravee, C.S., McCarthy, P.M., Altamentova, S.M., Wong, A.P., Skrtic,  
1096 M., Verma, S., Weisel, R.D., and Li, R.-K. (2006). Altered expression of disintegrin  
1097 metalloproteinases and their inhibitor in human dilated cardiomyopathy. *Circulation*  
1098 113, 238-245.
- 1099 82. Lehka, L., and Redowicz, M.J. (2020). Mechanisms regulating myoblast fusion: a  
1100 multilevel interplay. *Semin Cell Dev Biol* 104, 81-92.
- 1101 83. Altmutawa, W., Smith, C., Sabouny, R., Smit, R.B., Zhao, T., Wong, R., Lee-Glover, L.,  
1102 Desrochers-Goyette, J., Ilamathi, H.S., Consortium, C.R.C., et al. (2019). The R941L  
1103 mutation in MYH14 disrupts mitochondrial fission and associates with peripheral  
1104 neuropathy *EBioMedicine* 45, 379-392.
- 1105 84. Fan, S., Tian, T., Chen, W., Lv, X., Lei, X., Zhang, H., Sun, S., Cai, L., Pan, G., He, L., et  
1106 al. (2019). Mitochondrial miRNA Determines Chemoresistance by Reprogramming  
1107 Metabolism and Regulating Mitochondrial Transcription. *Cancer Res* 79, 1069-1084.
- 1108 85. Narozna, M., and Rubis, B. (2021). Anti-SARS-CoV-2 Strategies and the Potential Role  
1109 of miRNA in the Assessment of COVID-19 Morbidity, Recurrence, and Therapy *Int J*  
1110 *Mol Sci* 22, 8663.
- 1111 86. Liao, W., Liang, P., Liu, B., Xu, Z., Zhang, L., Feng, M., Tang, Y., and Xu, A. (2020).  
1112 MicroRNA-140-5p Mediates Renal Fibrosis Through TGF- $\beta$ 1/Smad Signaling  
1113 Pathway by Directly Targeting TGFBR1. *Front Physiol* 11, 1093.
- 1114 87. Zhang, X., Chang, A., Li, Y., Gao, Y., Wang, H., Ma, Z., Li, X., and Wang, B. (2015).  
1115 miR-140-5p regulates adipocyte differentiation by targeting transforming growth  
1116 factor- $\beta$  signaling. *Sci Rep* 5, 18118.
- 1117 88. Liu, L., Li, T.-M., Liu, X.-R., Bai, Y.-P., Li, J., Tang, N., and Wang, X.-B. (2019).  
1118 MicroRNA-140 inhibits skeletal muscle glycolysis and atrophy in endotoxin-induced

- 1119 sepsis in mice via the WNT signaling pathway *Am J Physiol Cell Physiol* 317, C189-  
1120 C199.
- 1121 89. Feng, B., Chen, S., Gordon, A.D., and Chakrabarti, S. (2017). miR-146a mediates  
1122 inflammatory changes and fibrosis in the heart in diabetes. *J Mol Cell Cardiol* 105,  
1123 70-76.
- 1124 90. Liu, Y., Luo, Y., Shen, L., Guo, R., Zhan, Z., Yuan, N., Sha, R., Qian, W., Wang, Z., Xie,  
1125 Z., et al. (2020). Splicing factor SRSF1 is essential for satellite cell proliferation and  
1126 postnatal maturation of neuromuscular junctions in mice. *Stem Cell Rep* 15, 941-954.
- 1127 91. Zullo, J.M., Demarco, I.A., Pique-Regi, R., Gaffney, D.J., Epstein, C.B., Spooner, C.J.,  
1128 Luperchio, T.R., Bernstein, B.E., Pritchard, J.K., Reddy, K.L., et al. (2012). DNA  
1129 sequence-dependent compartmentalization and silencing of chromatin at the nuclear  
1130 lamina. *Cell* 149, 1474-1487.
- 1131 92. Demmerle, J., Koch, A.J., and Holaska, J.M. (2013). Emerin and histone deacetylase 3  
1132 (HDAC3) cooperatively regulate expression and nuclear positions of MyoD, Myf5,  
1133 and Pax7 genes during myogenesis. *Chromosome Res* 21, 765-779.
- 1134 93. Zwerger, M., Jaalouk, D.E., Lombardi, M.L., Isermann, P., Mauermann, M., Dialynas, G.,  
1135 Herrmann, H., Wallrath, L.L., and Lammerding, J. (2013). Myopathic lamin mutations  
1136 impair nuclear stability in cells and tissue and disrupt nucleo-cytoskeletal coupling.  
1137 *Hum Mol Genet* 22, 2335-2349.
- 1138 94. Ziat, E., Mamchaoui, K., Beuvin, M., Nelson, I., Azibani, F., Spuler, S., Bonne, G., and  
1139 Bertrand, A.T. (2016). FHL1B Interacts with Lamin A/C and Emerin at the Nuclear  
1140 Lamina and is Misregulated in Emery-Dreifuss Muscular Dystrophy. *Neuromuscul*  
1141 *Disord* 3, 497-510.
- 1142 95. Bonne, G., Leturcq, F., and Yaou, R.B. (2004). Emery-Dreifuss muscular dystrophy.  
1143 *GeneReviews* PMID:20301609.
- 1144 96. Dobin, A., Davis, C.A., Schlesinger, F., Drenkow, J., Zaleski, C., Jha, S., Batut, P.,  
1145 Chaisson, M., and Gingeras, T.R. (2013). STAR: ultrafast universal RNA-seq aligner.  
1146 *Bioinformatics* 29, 15-21.

- 1147 97. Bolger, A.M., Lohse, M., and Usadel, B. (2014). Trimmomatic: a flexible trimmer for  
1148 Illumina sequence data. *Bioinformatics* 30, 2114-2120.
- 1149 98. Love, M.I., Huber, W., and Anders, S. (2014). Moderated estimation of fold change and  
1150 dispersion for RNA-seq data with DESeq2. *Genome Biol* 15, 550.
- 1151 99. Patro, R., Duggal, G., Love, M.I., Irizarry, R.A., and Kingsford, C. (2017). Salmon: fast  
1152 and bias-aware quantification of transcript expression using dual-phase inference.  
1153 *Nat Methods* 14, 417-419.
- 1154 100. Ritchie, M.E., Phipson, B., Wu, D., Hu, Y., Law, C.W., Shi, W., and Smyth, G.K. (2015).  
1155 limma powers differential expression analyses for RNA-sequencing and microarray  
1156 studies. *Nucleic Acids Res* 43, e47.
- 1157 101. Reimand, J., Arak, T., Adler, P., Kolberg, L., Reisberg, S., Peterson, H., and Vilo, J.  
1158 (2016). g:Profiler-a web server for functional interpretation of gene lists (2016  
1159 update). *Nucleic Acids Res* 44, W83-89.
- 1160 102. Jain, A., and Tuteja, G. (2019). TissueEnrich: Tissue-specific gene enrichment  
1161 analysis. *Bioinformatics* 35, 1966-1967.
- 1162 103. Shannon, P., Markiel, A., Ozier, O., Baliga, N.S., Wang, J.T., Ramage, D., Amin, N.,  
1163 Schwikowski, B., and Ideker, T. (2003). Cytoscape: a software environment for  
1164 integrated models of biomolecular interaction networks. *Genome Res* 13, 2498-2504.
- 1165 104. Rooney, J.P., Ryde, I.T., Sanders, L.H., Howlett, E.H., Colton, M.D., Germ, K.E.,  
1166 Mayer, G.D., Greenamyre, J.T., and Meyer, J.N. (2015). PCR based determination of  
1167 mitochondrial DNA copy number in multiple species. *Methods Mol Biol* 1241, 23-38.
- 1168 105. Nakhle, J., Ozkan, T., Lněničková, K., Briolotti, P., and Vignais, M.-L. (2020). Methods  
1169 for simultaneous and quantitative isolation of mitochondrial DNA, nuclear DNA and  
1170 RNA from mammalian cells. *Biotechniques* 69, 436-442.
- 1171 106. Anders, S., Reyes, A., and Huber, W. (2012). Detecting differential usage of exons from  
1172 RNA-seq data. *Genome Res* 22, 2008-2017.

- 1173 107. Shen, S., Park, J.W., Lu, Z.-x., and Xing, Y. (2014). rMATS: Robust and flexible  
1174 detection of differential alternative splicing from replicate RNA-Seq data. *Proc Natl*  
1175 *Acad Sci U S A* 111, E5593-E5601.
- 1176 108. Bray, N.L., Pimentel, H., Melsted, P., and Pachter, L. (2016). Near-optimal probabilistic  
1177 RNA-seq quantification. *Nat Biotechnol* 34, 525-527.
- 1178 109. Vitting-Seerup, K., and Sandelin, A. (2019). IsoformSwitchAnalyzeR: analysis of  
1179 changes in genome-wide patterns of alternative splicing and its functional  
1180 consequences. *Bioinformatics* 35, 4469-4471.
- 1181 110. Walter, W., Sánchez-Cabo, F., and Ricote, M. (2015). GOplot: an R package for  
1182 visually combining expression data with functional analysis. *Bioinformatics* 31, 2912-  
1183 2914.
- 1184 111. Kolberg, L., Raudvere, U., Kuzmin, I., Vilo, J., and Peterson, H. (2020). gprofiler2 -- an  
1185 R package for gene list functional enrichment analysis and namespace conversion  
1186 toolset g:Profiler. *F1000Res* 9, ELIXIR-709.
- 1187 112. Kang, Y.-J., Yang, D.-C., Kong, L., Hou, M., Meng, Y.-Q., Wei, L., and Gao, G. (2017).  
1188 CPC2: a fast and accurate coding potential calculator based on sequence intrinsic  
1189 features. *Nucleic Acids Res* 45, W12-W16.
- 1190 113. Finn, R.D., Clements, J., and Eddy, S.R. (2011). HMMER web server: interactive  
1191 sequence similarity searching. *Nucleic Acids Res* 39, W29-37.
- 1192 114. Nielsen, H., Engelbrecht, J., Brunak, S., and von Heijne, G. (1997). A neural network  
1193 method for identification of prokaryotic and eukaryotic signal peptides and prediction  
1194 of their cleavage sites. *Int J Neural Syst* 8, 581-599.
- 1195 115. Meszaros, B., Erdos, G., and Dosztányi, Z. (2018). IUPred2A: context-dependent  
1196 prediction of protein disorder as a function of redox state and protein binding. *Nucleic*  
1197 *Acids Res* 46, W329-W337.
- 1198
- 1199
- 1200

1201 **Legends to Figures and Tables**

1202 **Table 1. Patients and Controls used in this study.**

1203 List of patients and controls including gene, mutation, age at biopsy, age of onset, sex,  
1204 creatine kinase (CK) levels, clinical features, and the muscle groups from whence biopsies  
1205 were obtained. Note that the normal range for CK levels is 25-200 U/l.

1206

1207 **Figure 1. RNA-Seq for EDMD** A. Workflow. Muscle biopsies were taken from the regions  
1208 described in Table 1 and myoblasts recovered. These were then differentiated *in vitro* into  
1209 myotubes, and myotubes selectively recovered by partial trypsinization. Myotube RNA was  
1210 extracted and used for sequencing. Scale bar 20 $\mu$ m. B. Number of genes differentially  
1211 expressed (FDR 5%) for each individual patient and for all patients considered together as a  
1212 single group (denoted as "G1"). C. Heatmap of log<sub>2</sub>FC values for genes changing  
1213 expression in EDMD patients compared to healthy controls (G1). Red is upregulated and  
1214 blue is downregulated. Black indicates no change. The G1 lane is the averaged data across  
1215 all patients. D. Dendrogram showing the relationships between patients, which fall into three  
1216 broad groups. E. Overlaps with genome-organizing NETs gene targets. The numbers of  
1217 genes altered by knockdown of muscle-specific genome-organizing NETs Wfs1, Tmem38a,  
1218 NET39, or Tmem214 that were also altered in the EDMD patient cells is given. G1 refers to  
1219 the analysis of all 10 patients as a single group against the healthy controls, while gp1-3  
1220 refers to the three subgroups identified. Total number of differentially expressed (DE) genes  
1221 are given for each.

1222

1223 **Figure 2. Search for functional categories changing in EDMD patients** A. Box plot of  
1224 log<sub>2</sub>FC values for differentially expressed genes within significantly enriched functional  
1225 categories in EDMD patients analyzed in the Bakay study using g:profiler. B. Box plot of  
1226 log<sub>2</sub>FC values for differentially expressed genes within significantly enriched functional  
1227 categories in EDMD patients analyzed in this study using g:profiler. C. Box plot of log<sub>2</sub>FC  
1228 values for leading edge genes within significantly enriched functional categories in EDMD

1229 patients analyzed in this study using GSEA pathway (C2 geneset collection: canonical  
1230 pathways). D. GSEA enrichment plot for mitochondrially encoded genes. GSEA analysis  
1231 using the C1 geneset (positional) revealed an upregulation of mitochondrially encoded  
1232 genes. See Supplemental Table S3 for further details.

1233

1234 **Figure 3. Metabolism changes confirmed in patients.** A. Heatmap of all mitochondria-  
1235 encoded genes showing almost uniform upregulation in EDMD patients. B. Heatmap of  
1236 nuclear-encoded downregulated genes in Bakay's study that supported mitochondria  
1237 function. Downregulation is also generally observed in patients belonging to Group 1, but not  
1238 Groups 2 or 3. Functional analyses performed in primary patient (n=12) and control (n=7)  
1239 myoblast cultures for C. glycolysis and basal respiration show a significant reduction of both  
1240 in EDMD myoblast cultures. D. Testing for fuel dependency we could not observe any  
1241 changes (\* glucose and fatty acids have been measured; glutamine calculated). E. ATP  
1242 production is reduced in EDMD samples. All functional experiments have been repeated in  
1243 at least three independent experiments. F. qPCR of mitochondria shows a reduction of  
1244 mitochondria in EDMD myoblasts. G. Heatmap of mitophagy genes (GO-BP, GO:0000422,  
1245 Autophagy of the mitochondrion) that are differentially expressed in at least one of Bakay's  
1246 EDMD, G1 analysis (all 10 patients analyzed as a single group), or G3 analysis (each of the  
1247 three subgroups analyzed separately).

1248

1249 **Figure 4. Genes changing expression within functional groups supporting ECM/  
1250 fibrosis/ myotube fusion.** A. Summary of altered functions in EDMD. B. Heatmap showing  
1251 gene expression changes for collagens. C. Heatmap showing gene expression changes for  
1252 matrix metalloproteinases. D. Heatmap showing gene expression changes for general  
1253 proteins involved in fibrosis according to FibroAtlas (<http://biokb.ncpsb.org.cn/fibroatlas>). E.  
1254 Heatmap showing gene expression changes for cytokine signaling proteins (GO-BP,  
1255 GO:0019221). F. Heatmap showing gene expression changes for interferon-gamma  
1256 signaling proteins (WikiPathways, WP619). G. Heatmap showing downregulation of genes

1257 involved in the degradation of cell cycle proteins. GSEA identified downregulation in EDMD  
1258 patients of REACTOME hsa-1741423 (APC-C mediated degradation of cell cycle proteins)  
1259 and hsa-187577 (SCF/SKP2 mediated degradation of p27/p21) (Fig. 2C). Both genesets  
1260 were combined. H. Heatmap showing gene expression changes for skeletal muscle  
1261 regeneration proteins (GO-BP, GO:0043403). I. Heatmap showing gene expression changes  
1262 for myoblast fusion (GO-BP, GO:0007520). J. Heatmap showing gene expression changes  
1263 for myoblast differentiation (GO-BP, GO:0045445). K. Heatmap showing gene expression  
1264 changes for specific genes functioning in myotube fusion that are under genome-organizing  
1265 NET regulation. L. Heatmap showing the upregulation of many pro-adipogenic genes  
1266 (Wikipathways, WP236). All heatmaps were generated from differentially expressed genes  
1267 in at least one of Bakay's EDMD, G1 analysis (all 10 patients analyzed as a single group), or  
1268 G3 analysis (each of the three subgroups analyzed separately). K-means unsupervised  
1269 hierarchical clustering was used to summarize the heatmap into 8 clusters of roughly  
1270 coexpressing genes. Full heatmaps displaying gene names are provided in **Figures S5-S11**.  
1271 The number of genes per cluster is indicated on the right of each heatmap. Red and blue  
1272 indicate upregulation and downregulation respectively.

1273

1274 **Figure 5. Analysis of splicing defects reveals loss of muscle-specific splice variants.**

1275 A. GOChord plot for misregulated splicing factors indicates the primary change is  
1276 upregulation of alternative splicing and downregulation of constitutive splicing. Plot for gp1 is  
1277 shown as a representative. DE genes  $\log_2FC > |0.15|$  and  $p < 0.05$ . B. Venn diagrams of  
1278 alternatively spliced genes predicted by rMATS, DEXSeq and ISA for all samples (G1) and  
1279 the three subgroups (gp1, gp2 and gp3). Overlap between all three methods indicates genes  
1280 with exon skipping events that lead to annotated isoform switches. C. Bar chart for functional  
1281 pathways reveal an enrichment in altered splice variants for pathways associated with  
1282 metabolism, gene expression, cytoskeleton organization, DNA repair, proliferation/  
1283 differentiation, stress, ECM/ fibrosis/ and sarcomere structure. Number of genes detected  
1284 displayed as  $\log_2$ . E. Pie Chart of significant AS events with  $\psi > |0.1|$  in gp1 detected with



1285 rMATS, which were used to scan for muscle specific splice variants, shown as Heatmap. AS  
1286 events SE = exon skipping, MXE= mutually exclusive exons, RI = intron retention, A3SS =  
1287 alternative 3' splice site, A5SS = alternative 5' splice site. F. Isoform switches as analyzed  
1288 using isoformSwitchAnalyzer for ZNF880 and TMEM38A. ZNF880 shows the same isoform  
1289 switch in all groups with preferential use of the shorter isoform, that contains the KRAB  
1290 domain (black), but not the zinc finger domain (blue). TMEM38A shows a clear switch from  
1291 the muscle isoform to a shorter isoform.

1292

1293 **Figure 6. miRNA analysis.** A. Heatmap of miRNAs that had altered levels in EDMD patient  
1294 cells compared to controls. Red indicates upregulated and blue downregulated with intensity  
1295 according to the log<sub>2</sub>FC values. B. Overview of functional categories linked to differentially  
1296 expressed miRNAs in EDMD. The label size is proportional to the number of DE miRNAs  
1297 associated with each category.

1298

1299 **Figure 7. EDMD is distinct from other MDs.** A. Scatterplots from GSEA analysis  
1300 comparing Bakay data for several muscular dystrophies to the new patient data from this  
1301 study (all 10 patients as a single group = G1). On the x axis, the Normalized Enriched Score  
1302 (NES) is a measurement of the enrichment of the DE geneset identified in our study  
1303 compared to each of the diseases in the Bakay study. The y axis shows the -log<sub>10</sub>(FDR),  
1304 which is a measurement of statistical confidence. The grey horizontal line marks the 5%  
1305 FDR threshold. Muscular dystrophies from the Bakay study are EDMD, Limb-Girdle  
1306 muscular dystrophy 2A (LGMD2A), Limb-Girdle muscular dystrophy 2B (LGMD2B), Limb-  
1307 Girdle muscular dystrophy 2I (LGMD2I), FascioScapuloHumeral muscular dystrophy  
1308 (FSHD), Duchenne Muscular Dystrophy (DMD), Becker Muscular Dystrophy (BMD),  
1309 Juvenile Dermatomyositis (JDM), Acute Quadriplegic Myopathy (AQM), Amyotrophic Lateral  
1310 Sclerosis (ALS) and Hereditary Spastic Paraplegia (HSP). B. Same as A, for each individual  
1311 patient subgroup. C. Box plot of log<sub>2</sub>FC values for differentially expressed genes within  
1312 significantly enriched functional categories for each patient subgroup compared to the rest,

1313 using g:Profiler. D. Each patient subgroup was relatively more enriched for certain functional  
1314 pathways than other subgroups, suggesting that treatments for example targeting different  
1315 metabolic pathways for groups 1 and 3 might partially ameliorate some patient difficulties.  
1316

1317 Table 1

| ID  | gene    | mutation           | RNAseq | metabolic analysis | age | age of onset | sex | CK(U/l)     | muscle weakness | contractures | cardiac defects | neurological defects | biopsy location              | other clinical information         |
|-----|---------|--------------------|--------|--------------------|-----|--------------|-----|-------------|-----------------|--------------|-----------------|----------------------|------------------------------|------------------------------------|
| C1  | control |                    | yes    | yes                | 35  |              | M   |             | no              | no           | no              |                      | Gastrocnemius caput laterale |                                    |
| C2  | control |                    | yes    | yes                | 13  |              | M   |             | no              | no           | no              |                      |                              |                                    |
| C3  | control |                    |        | yes                | 43  |              | M   |             | no              | no           | no              |                      | Biceps brachii               |                                    |
| C4  | control |                    |        | yes                | 36  |              | F   |             | no              | no           | no              |                      | Biceps brachii               |                                    |
| C5  | control |                    |        | yes                | 49  |              | F   |             | no              | no           | no              |                      | Vastus lateralis             |                                    |
| C6  | control |                    |        | yes                | 49  |              | F   |             | no              | no           | no              |                      |                              |                                    |
| C7  | control |                    |        | yes                | 53  |              | M   |             | no              | no           | no              |                      | Vastus lateralis             |                                    |
| P1  | TMEM214 | p.179H             | yes    | yes                | 48  | 28           | F   | 350         | yes             |              | no              |                      | Rectus femoris               | LGMD, ptosis, type 2 fiber atrophy |
| P2  | PLPP7   | p.M92K             | yes    | yes                | 34  | 16           | F   | 400         | yes             |              | no              |                      | Vastus lateralis             | distal myopathy                    |
| P3  | SUN1    | p.G68D<br>p.G388S  | yes    | yes                | 9   | 10           | M   | >3000       | yes             | yes          | yes             |                      | Quadriceps femoris           |                                    |
| P4  | SYNE1   | p.6869*<br>p.6869* | yes    | yes                | 15  |              | F   | 347         | yes             |              |                 | yes                  | Quadriceps femoris           | growth deficit, ataxia             |
| P5  | EMD     | p.S58Sfs*1         | yes    | yes                | 17  | 12           | F   | 278         | yes             | yes          | yes             |                      | Biceps brachii               |                                    |
| P6  | FHL1    | c.688+1G>A         | yes    |                    | 28  |              | M   | 1000        | yes             |              | yes             |                      | Biceps brachii               |                                    |
| P7  | FHL1    | p.C224W            | yes    | yes                | 46  |              | M   | 300-1000    | yes             |              |                 |                      | Tibialis anterior            |                                    |
| P8  | FHL1    | p.V280M            | yes    | yes                | 21  |              | M   | 231         | yes             | yes          |                 |                      | Gastrocnemius caput laterale | rigid spine                        |
| P9  | LMNA    | p.T528K            | yes    |                    | 2   |              | M   |             | yes             |              |                 |                      |                              |                                    |
| P10 | LMNA    | p.R571S            | yes    | yes                | 24  | 9            | F   | up to 12000 | yes             |              |                 |                      |                              | degenerative myopathy              |
| P11 | LMNA    | p.R545C            |        | yes                | 18  |              | M   |             | yes             | yes          | yes             |                      |                              |                                    |
| P12 | LMNA    | p.R543W            |        | yes                | 12  |              | F   |             | yes             |              |                 |                      | Vastus lateralis             | acrogeria                          |
| P13 | unknown | unknown            |        | yes                | 14  |              | M   | 2800        | yes             | yes          | yes             |                      | Tibialis anterior            | degenerative myopathy              |
| P14 | FHL1    | p.C224W            |        | yes                | 42  |              | M   | 1700        | yes             | yes          | yes             |                      | Vastus lateralis             | myofibrillar myopathy              |

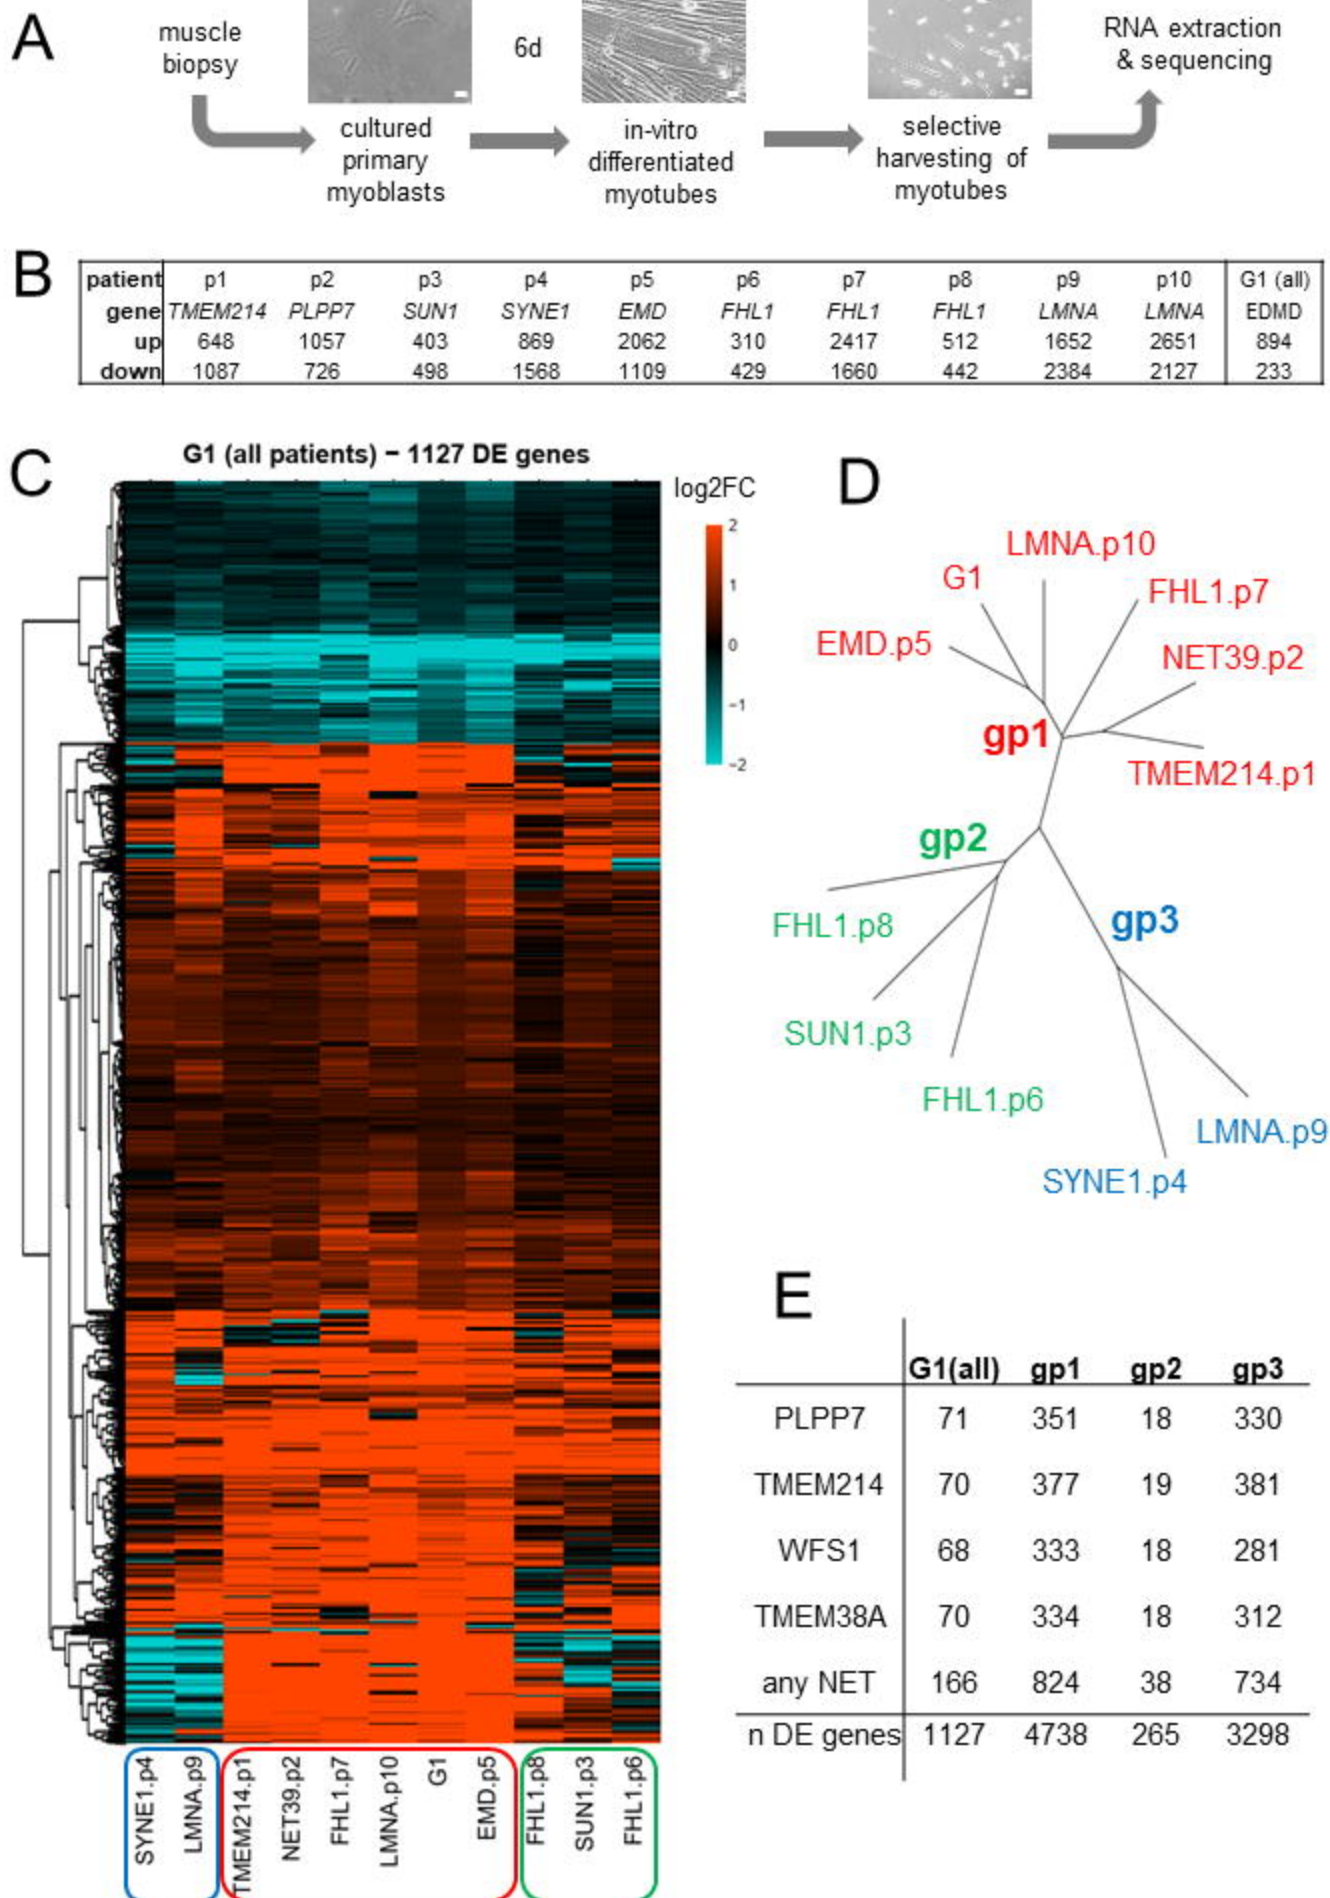

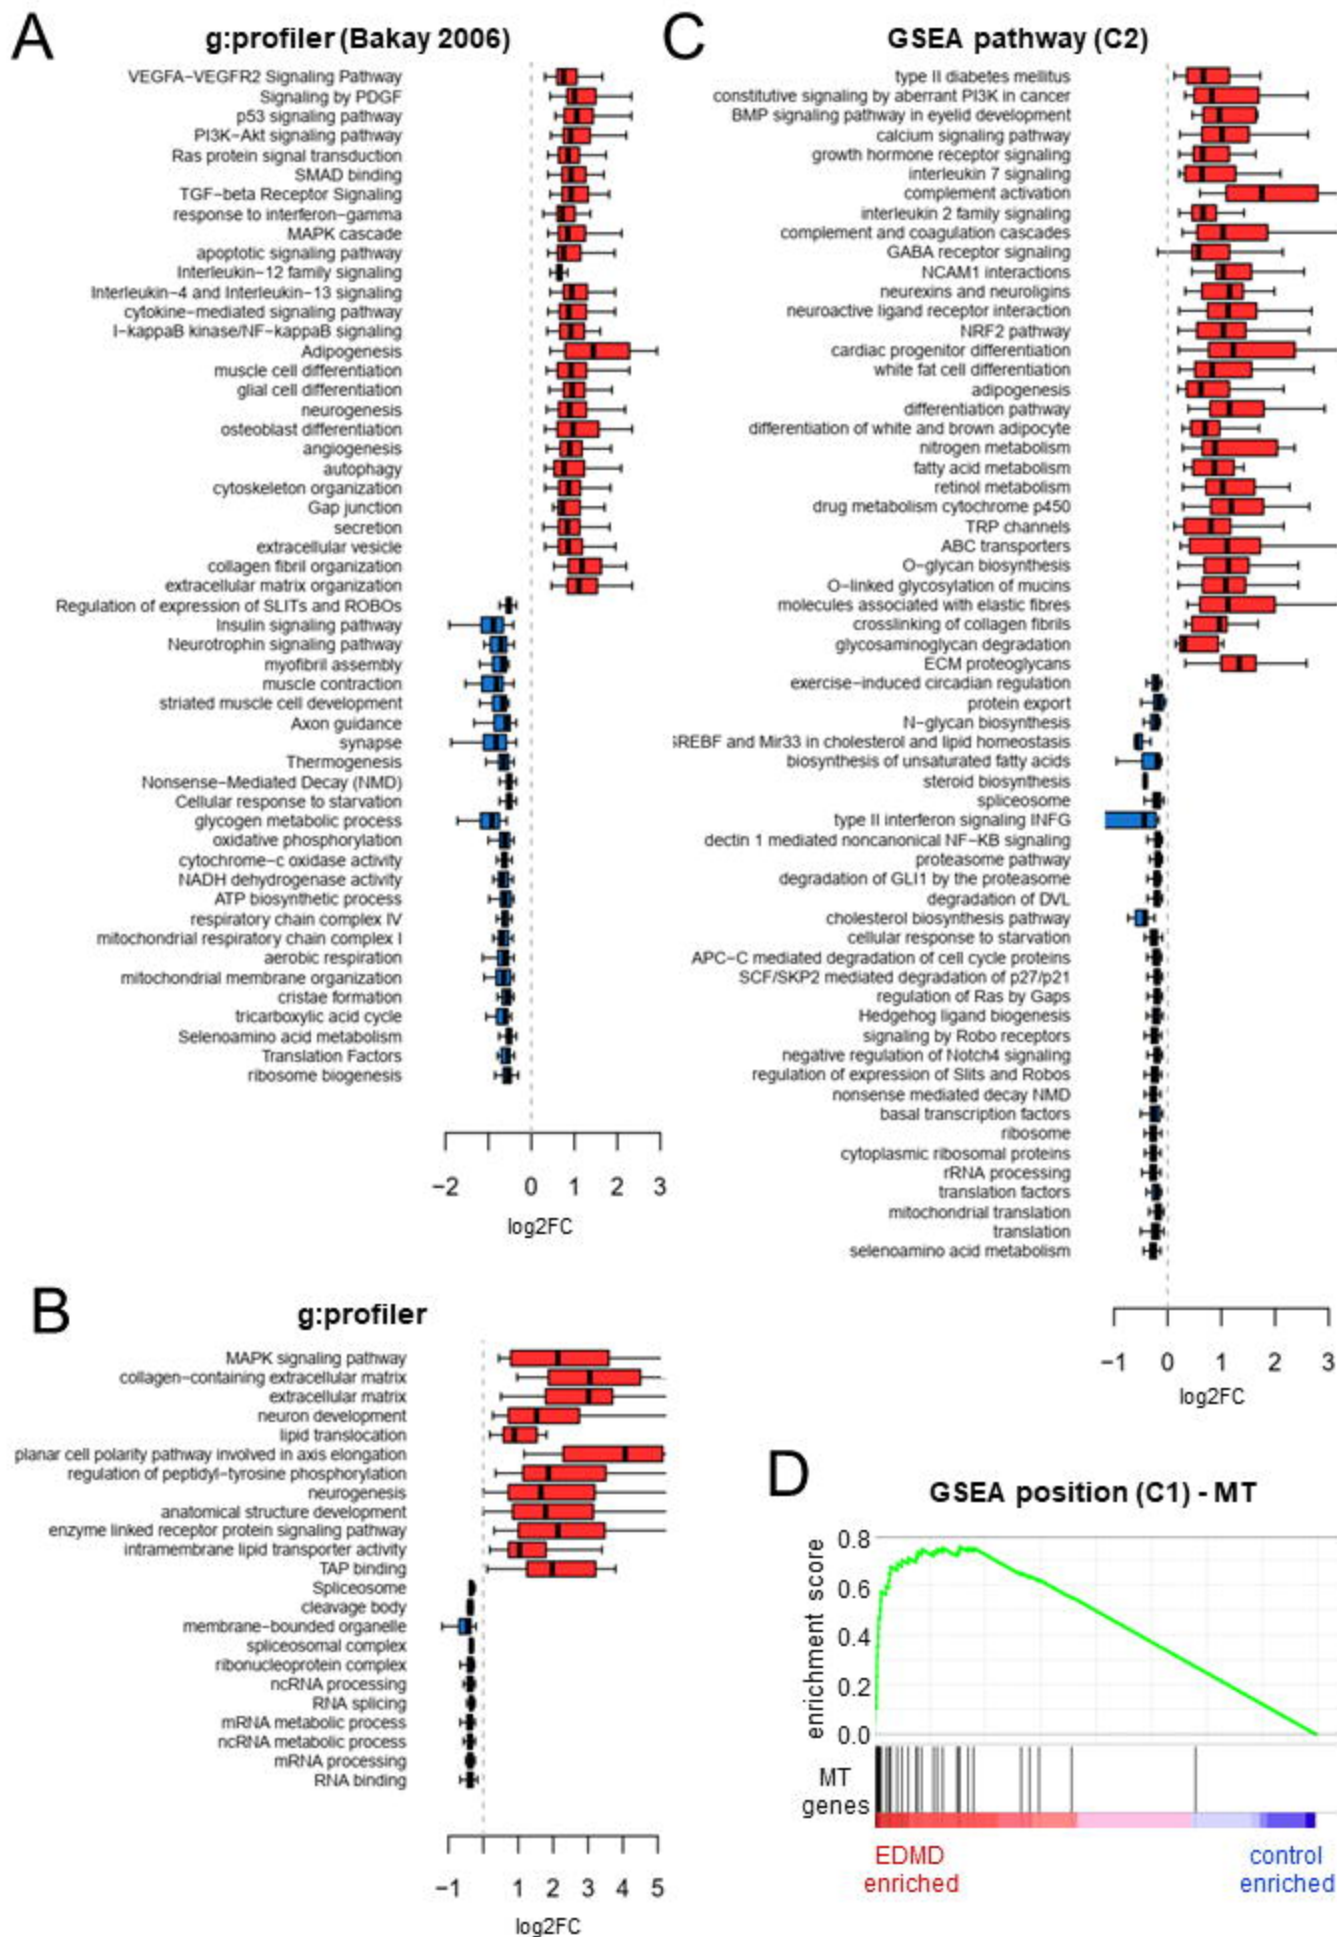



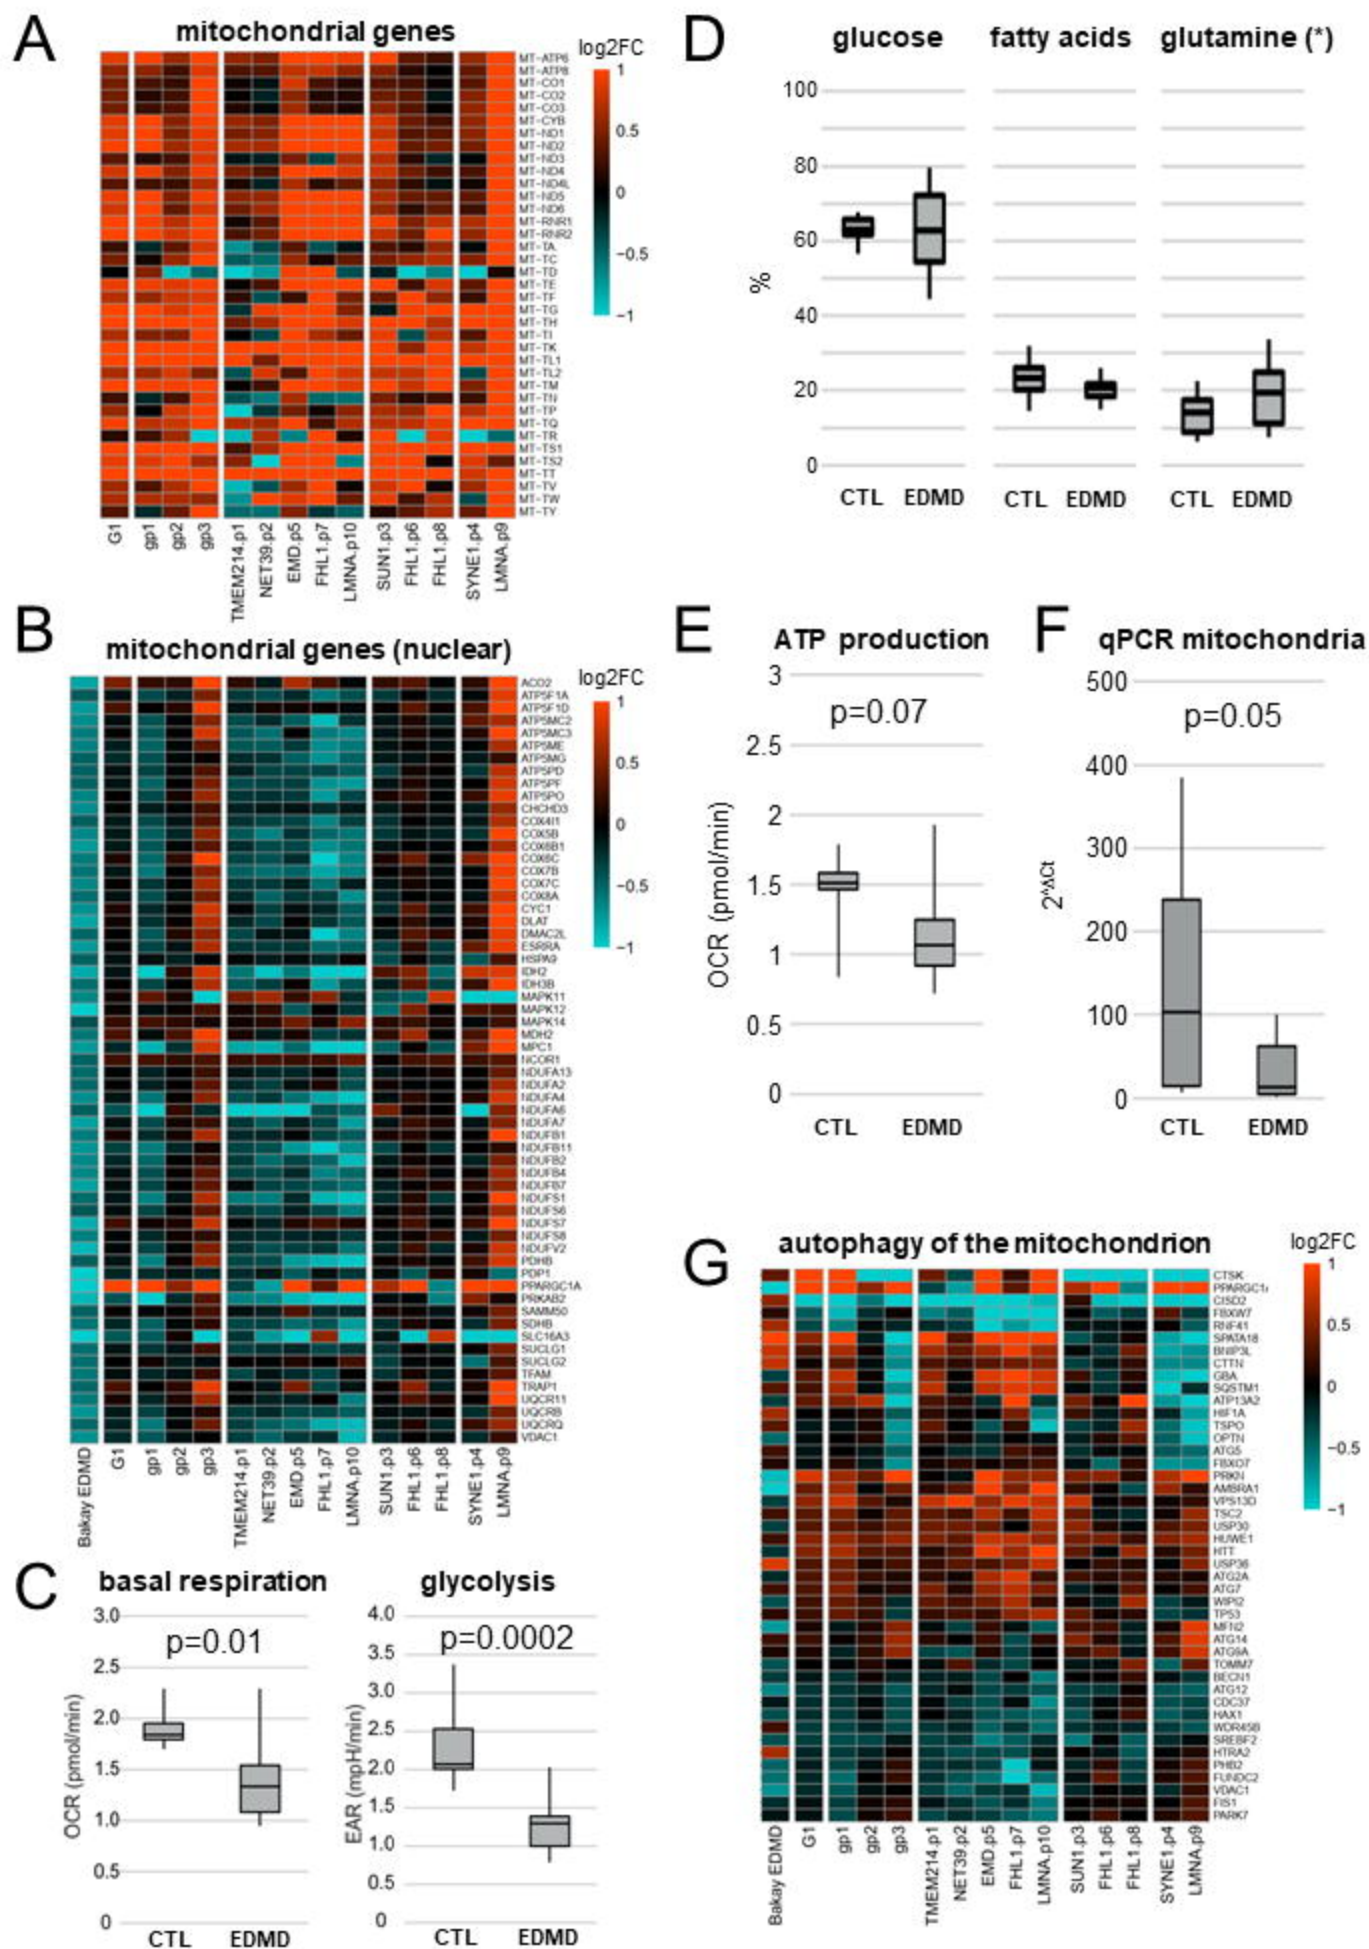

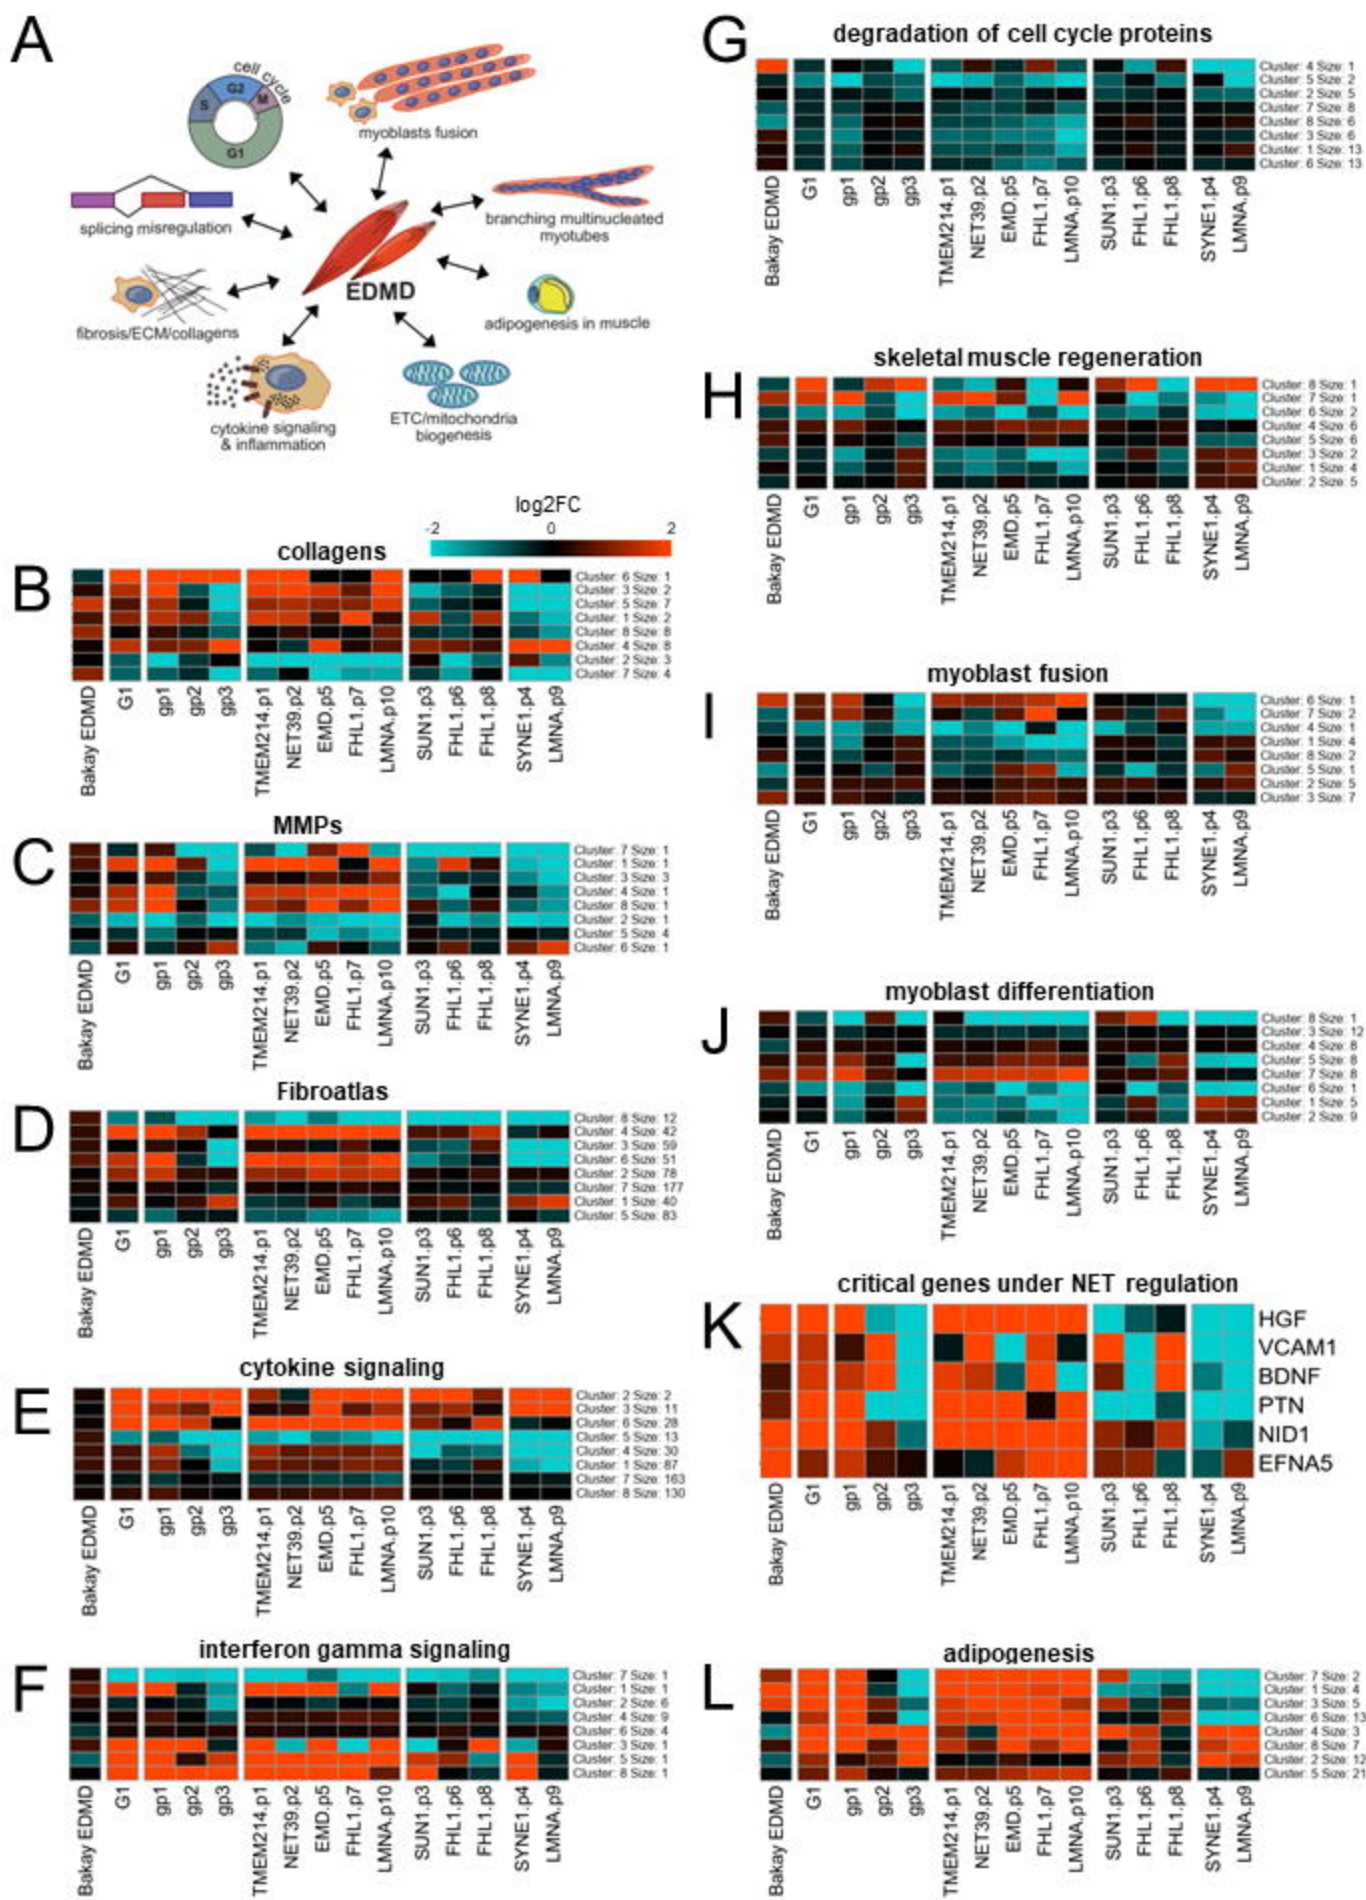



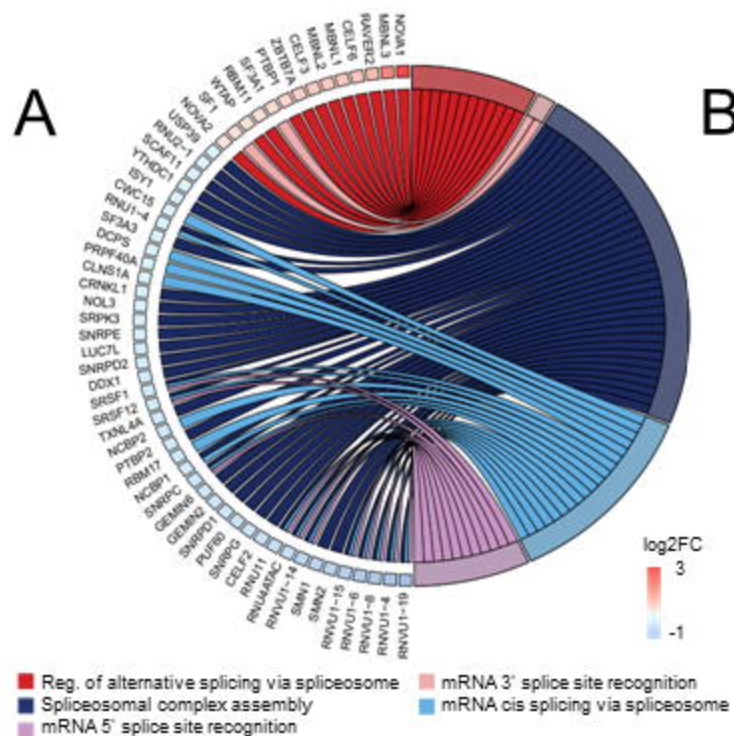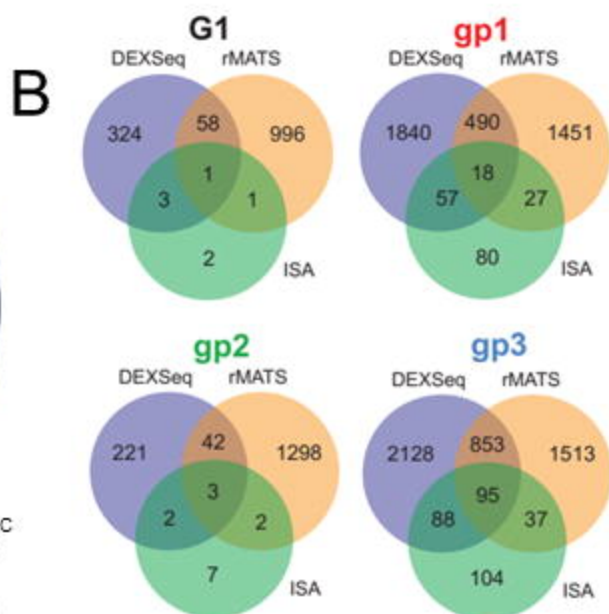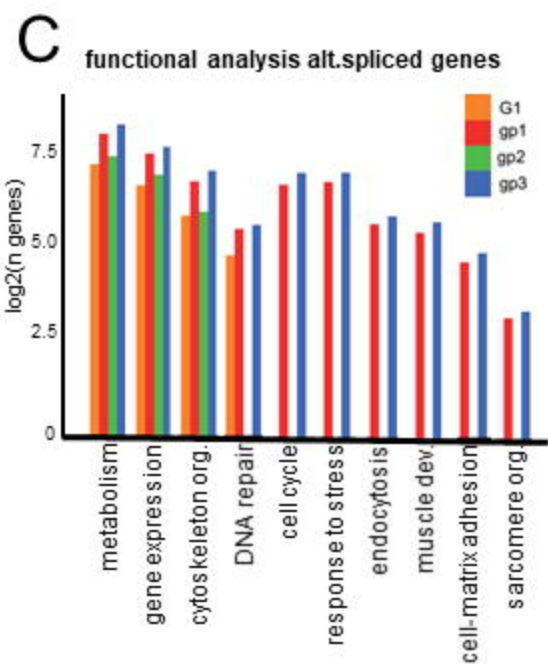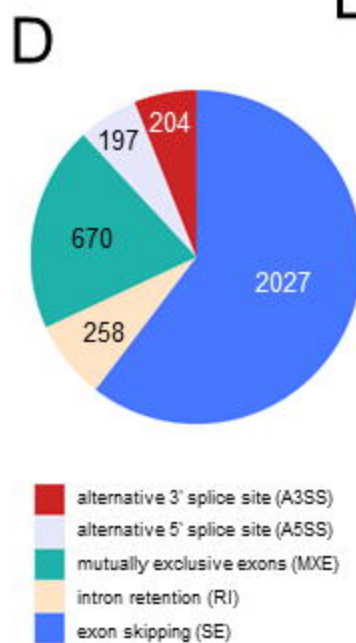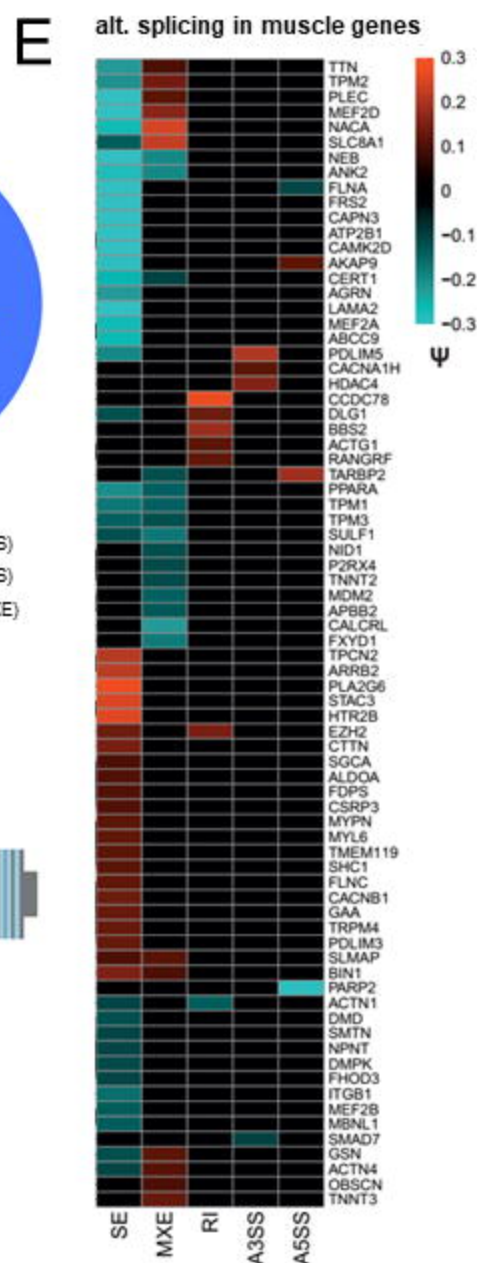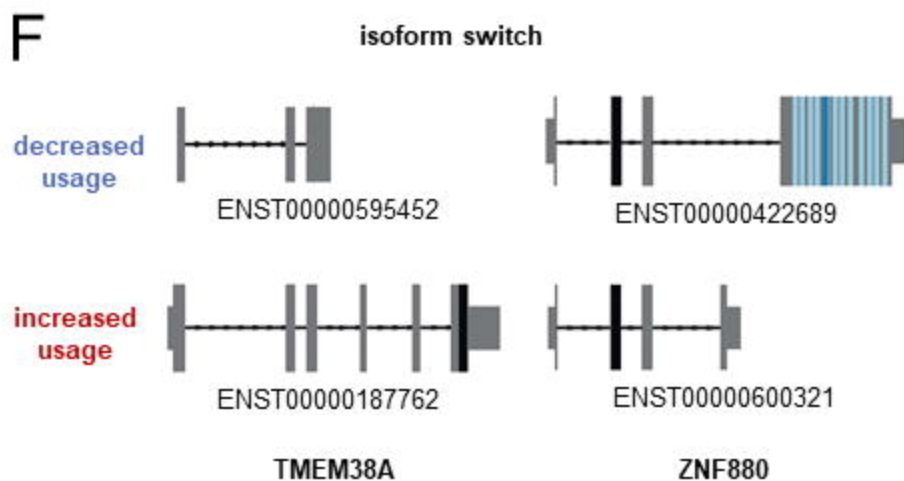



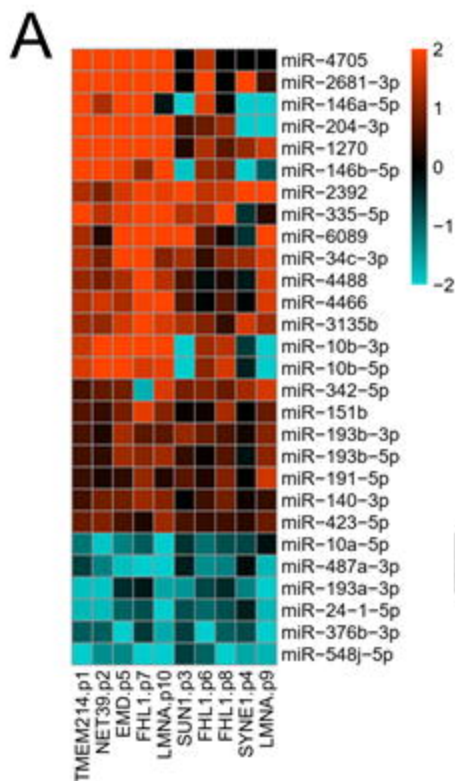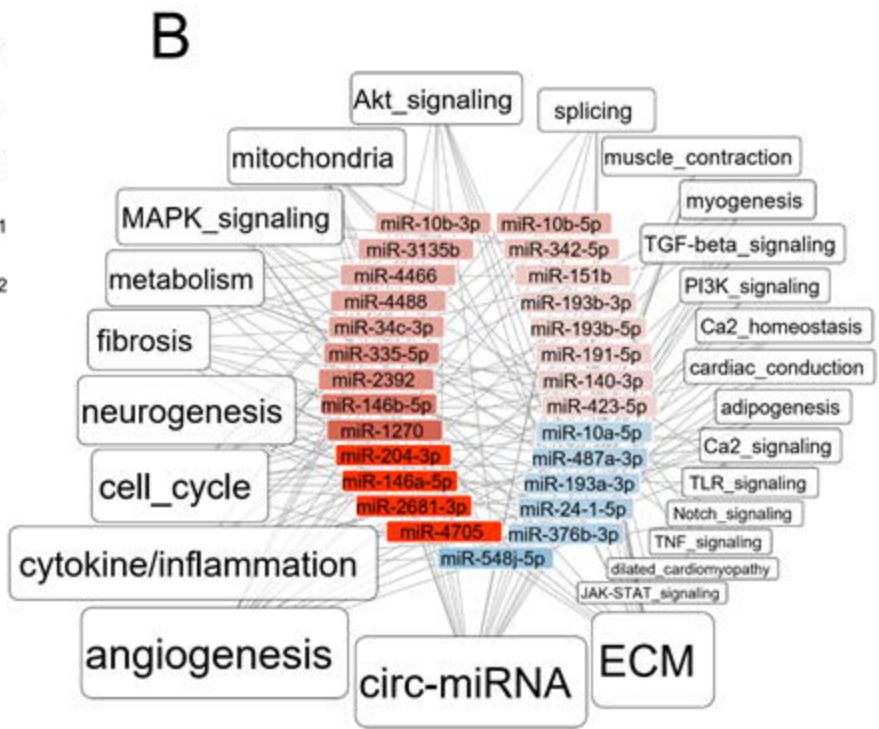

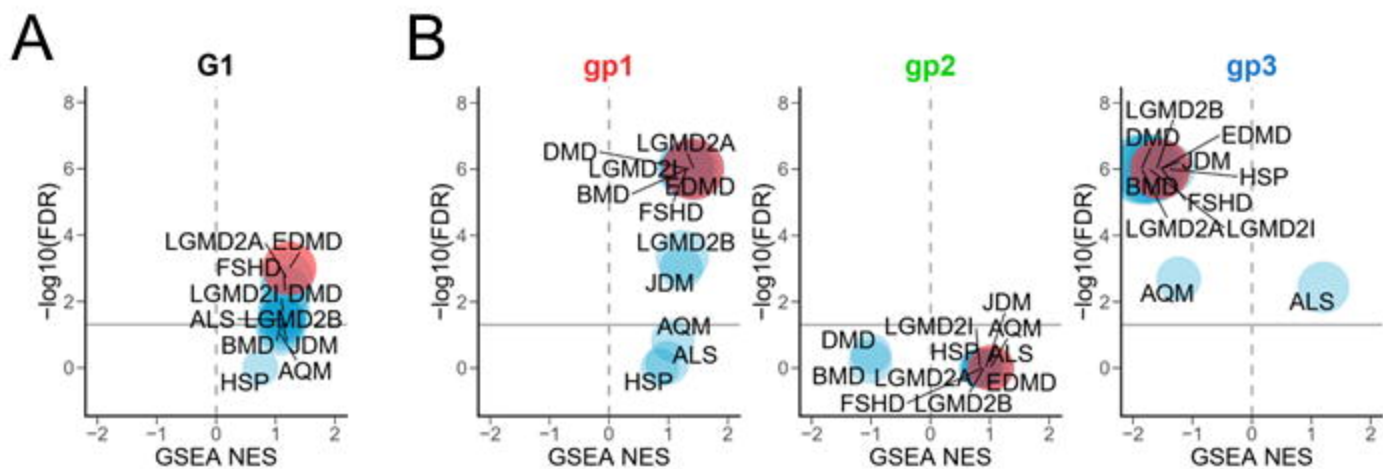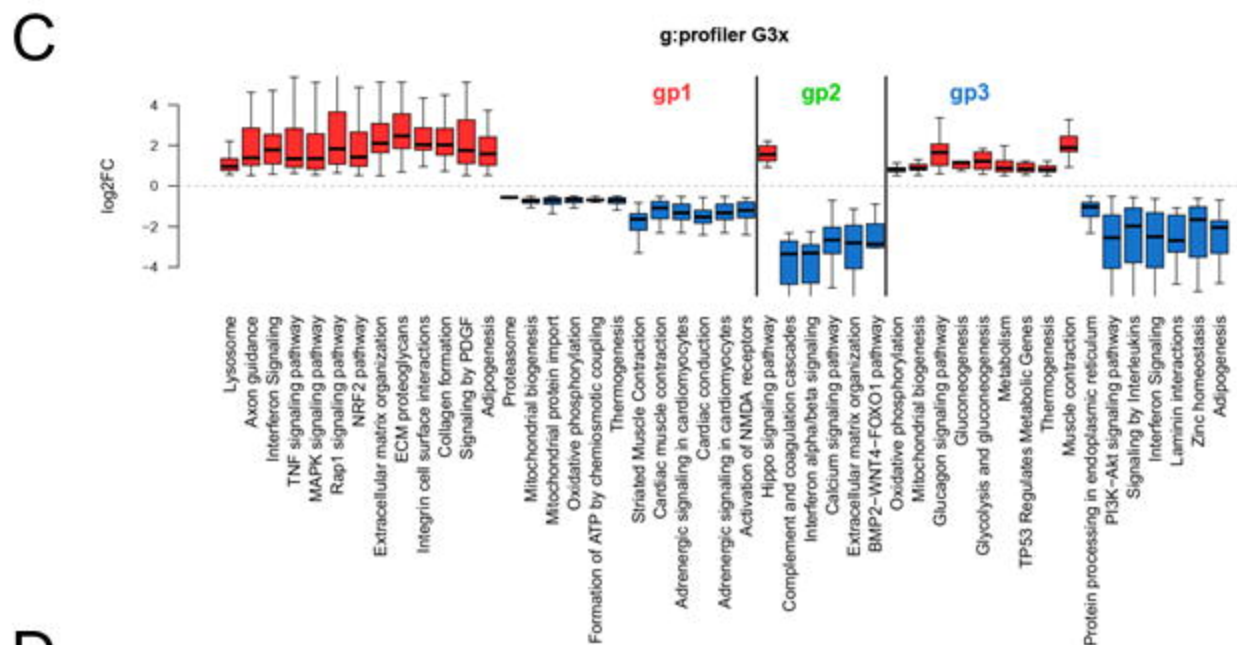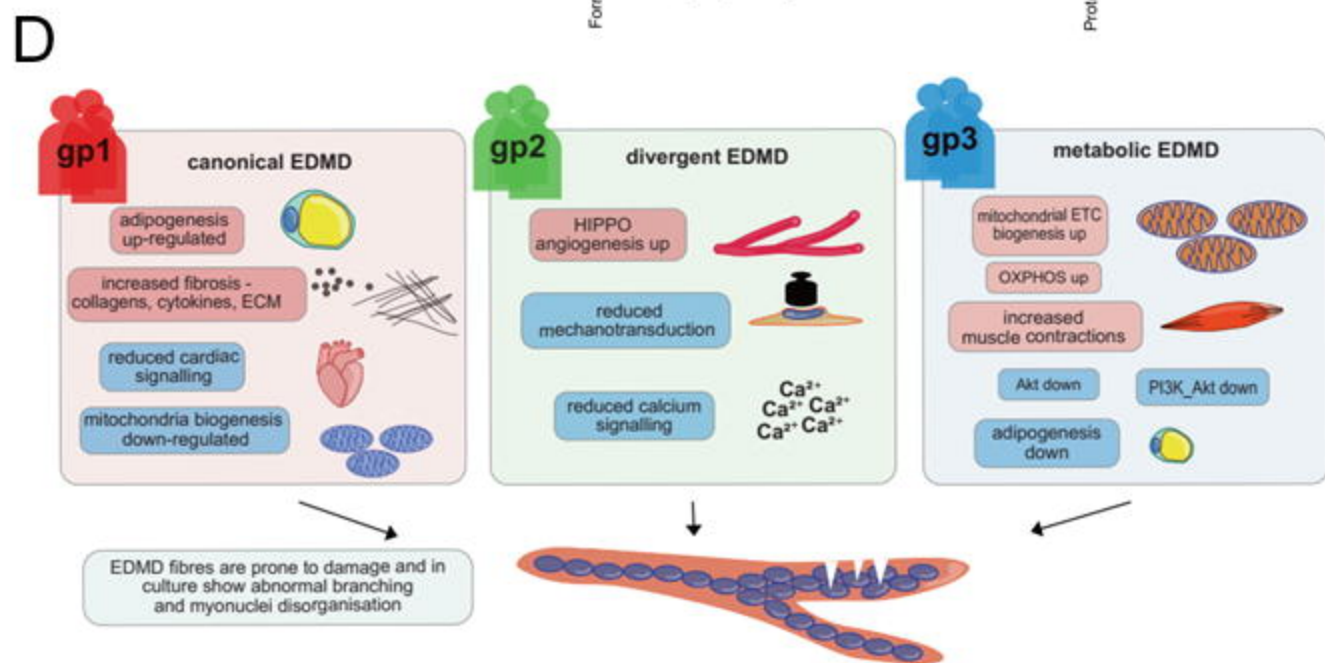

Source: http://biorxiv.org/content/10.1101/2022.05.20.492778v1.full.pdf
